# Supplementary material for: Loss of Heterozygosity Drives Adaptation in Hybrid Yeast
Source: PubMed Central journal article supplement (PMC5455960; doi:10.1093/molbev/msx098), 2017-03-29
Supplement: msx098_Supp.pdf [file msx098_Supp.pdf]

**Supplemental Table 1: Strain list**

| Strain  | Identifier<br>(see Tables<br>1, 2) | Genotype                                                                                                               | Species | Notes                                                          | Strain background |
|---------|------------------------------------|------------------------------------------------------------------------------------------------------------------------|---------|----------------------------------------------------------------|-------------------|
| YMD139  |                                    | <i>lys2Δ0/+ +/ura3-167 MATa/MATα</i>                                                                                   | cer     | Ancestor of <i>S. cerevisiae</i><br>evolved diploids (high Ty) | GRF167 x S288C    |
| YMD140  |                                    | <i>lys2Δ0/+ +/ura3-167 MATa/MATα</i>                                                                                   | cer     | Ancestor of <i>S. cerevisiae</i><br>evolved diploids           | GRF167 x S288C    |
| YMD129  |                                    | <i>HOΔ::kanMX/HOΔ::kanMX lys2-1/+ +/ura3-167 MATa/MATα</i>                                                             | hybrid  | Ancestor of evolved hybrids                                    | GRF167 x CBS7001  |
| YMD130  |                                    | <i>HOΔ::kanMX/HOΔ::kanMX lys2-1/+ +/ura3-167 (high Ty) MATa/MATα</i>                                                   | hybrid  | Ancestor of evolved hybrids (high Ty)                          | GRF167 x CBS7001  |
| YMD366  |                                    | <i>HOΔ::kanMX /HOΔ::kanMX lys2-1/+ ura3Δ::cloNAT/+ MATa/MATα</i>                                                       | uva     | Ancestor of <i>S. uvarum</i><br>evolved diploids               | CBS7001           |
| YMD35   | Pu1                                |                                                                                                                        | uva     | Phosphate limitation                                           | YMD366            |
| YMD92   | Pu2                                |                                                                                                                        | uva     | Phosphate limitation                                           | YMD366            |
| YMD18   | Pc3                                |                                                                                                                        | cer     | Phosphate limitation                                           | YMD140            |
| YMD77   | Pc1                                |                                                                                                                        | cer     | Phosphate limitation                                           | YMD140            |
| YMD66   | Pc4                                |                                                                                                                        | cer     | Phosphate limitation                                           | YMD139            |
| YMD98   | Pc2                                |                                                                                                                        | cer     | Phosphate limitation                                           | YMD139            |
| YMD30   | Ph1                                |                                                                                                                        | hybrid  | Phosphate limitation                                           | YMD130            |
| YMD39   | Ph2                                |                                                                                                                        | hybrid  | Phosphate limitation                                           | YMD130            |
| YMD90   | Ph3                                |                                                                                                                        | hybrid  | Phosphate limitation                                           | YMD129            |
| YMD101  | Ph5                                |                                                                                                                        | hybrid  | Phosphate limitation                                           | YMD130            |
| YMD741  | Ph4                                |                                                                                                                        | hybrid  | Phosphate limitation                                           | YMD129            |
| YMD744  | Ph6                                |                                                                                                                        | hybrid  | Phosphate limitation                                           | YMD129            |
| YMD723  | Gu1                                |                                                                                                                        | uva     | Glucose limitation                                             | YMD366            |
| YMD725  | Gu2                                |                                                                                                                        | uva     | Glucose limitation                                             | YMD366            |
| YMD34   | Gc2                                |                                                                                                                        | cer     | Glucose limitation                                             | YMD140            |
| YMD23   | Gc1                                |                                                                                                                        | cer     | Glucose limitation                                             | YMD139            |
| YMD726  | Gh1                                |                                                                                                                        | hybrid  | Glucose limitation                                             | YMD129            |
| YMD737  | Gh2                                |                                                                                                                        | hybrid  | Glucose limitation                                             | YMD130            |
| YMD739  | Gh3                                |                                                                                                                        | hybrid  | Glucose limitation                                             | YMD130            |
| YMD720  | Su1                                |                                                                                                                        | uva     | Sulfate limitation                                             | YMD366            |
| YMD721  | Su2                                |                                                                                                                        | uva     | Sulfate limitation                                             | YMD366            |
| YMD31   | Sc3                                |                                                                                                                        | cer     | Sulfate limitation                                             | YMD140            |
| YMD83   | Sc2                                |                                                                                                                        | cer     | Sulfate limitation                                             | YMD140            |
| YMD105  | Sc1                                |                                                                                                                        | cer     | Sulfate limitation                                             | YMD139            |
| YMD21   | Sc4                                |                                                                                                                        | cer     | Sulfate limitation                                             | YMD139            |
| YMD751  | Sh2                                |                                                                                                                        | hybrid  | Sulfate limitation                                             | YMD130            |
| YMD752  | Sh3                                |                                                                                                                        | hybrid  | Sulfate limitation                                             | YMD130            |
| YMD754  | Sh4                                |                                                                                                                        | hybrid  | Sulfate limitation                                             | YMD130            |
| YMD747  | Sh1                                |                                                                                                                        | hybrid  | Sulfate limitation                                             | YMD129            |
| YMD749  | Sh7                                |                                                                                                                        | hybrid  | Sulfate limitation                                             | YMD129            |
| YMD858  | Sh5                                |                                                                                                                        | hybrid  | Sulfate limitation                                             | YMD129            |
| YMD861  | Sh6                                |                                                                                                                        | hybrid  | Sulfate limitation                                             | YMD129            |
| YMD3348 |                                    | <i>ura3-167/+ MATa/MATα</i>                                                                                            | cer     | 2 preferred <i>S. cerevisiae</i><br>alleles at <i>PHO84</i>    |                   |
| YMD3349 |                                    | <i>PHO84Δ::ScPHO84</i> (un-preferred allele)/ <i>PHO84Δ::ScPHO84</i> (un-preferred allele) <i>ura3-167/+ MATa/MATα</i> | cer     | 2 un-preferred <i>S. cerevisiae</i><br>alleles at <i>PHO84</i> |                   |
| YMD3350 |                                    | <i>PHO84Δ::ScPHO84</i> (un-preferred                                                                                   | cer     | 1 preferred, 1 un-                                             |                   |

|         |  |                                                                                                         |        |                                                                                                                  |  |
|---------|--|---------------------------------------------------------------------------------------------------------|--------|------------------------------------------------------------------------------------------------------------------|--|
|         |  | allele)/+ <i>ura3-167/+ MATa/MATα</i>                                                                   |        | preferred <i>S. cerevisiae</i> allele at <i>PHO84</i>                                                            |  |
| YMD3351 |  | <i>ura3-167/ura3-167 MATa/MATα +pIL37-PHO84-URA3</i>                                                    | cer    | 3+ preferred <i>S. cerevisiae</i> alleles at <i>PHO84</i>                                                        |  |
| YMD3352 |  | <i>ura3-167/ura3-167 MATa/MATα +pIL37-URA3</i>                                                          | cer    | 2 preferred <i>S. cerevisiae</i> alleles at <i>PHO84</i> (empty plasmid control for YMD3351)                     |  |
| YMD3353 |  | <i>HOΔ::HYGb/HOΔ::kanMX lys2-1/+ ura3Δ::cloNAT/ura3-167 PHO84Δ::kanMX/+ MATa/MATα +pIL37-PHO84-URA3</i> | hybrid | 2+ preferred <i>S. cerevisiae</i> alleles at <i>PHO84</i>                                                        |  |
| YMD3354 |  | <i>HOΔ::HYGb/HOΔ::kanMX lys2-1/+ ura3Δ::cloNAT/ura3-167 PHO84Δ::kanMX/+ MATa/MATα +pIL37-URA3</i>       | hybrid | 1 preferred <i>S. cerevisiae</i> allele (empty plasmid control for YMD3353)                                      |  |
| YMD3355 |  | <i>HOΔ::HYGb/HOΔ::kanMX lys2-1/+ ura3Δ::cloNAT/ura3-167 MATa/MATα +pIL37-PHO84-URA3</i>                 | hybrid | 2+ preferred <i>S. cerevisiae</i> , 1 <i>S. uvarum</i> alleles at <i>PHO84</i>                                   |  |
| YMD3356 |  | <i>HOΔ::HYGb/HOΔ::kanMX lys2-1/+ ura3Δ::cloNAT/ura3-167 MATa/MATα +pIL37-URA3</i>                       | hybrid | 1 preferred <i>S. cerevisiae</i> , 1 <i>S. uvarum</i> allele at <i>PHO84</i> (empty plasmid control for YMD3355) |  |
| YMD3357 |  | <i>HOΔ::natMX-GFP/+ lys2-1/+ +ura3-167 MATa/MATα</i>                                                    | hybrid | GFP competitor strain for hybrids                                                                                |  |
| YMD3358 |  | <i>HOΔ::natMX-GFP/+ lys2-1/+ +ura3-167 MATa/MATα (high Ty)</i>                                          | hybrid | GFP competitor strain for hybrids (high Ty)                                                                      |  |
| YMD1459 |  | <i>HOΔ::kanMX-GFP/+ MATa/MATα</i>                                                                       | cer    | GFP competitor strain for <i>S. cerevisiae</i>                                                                   |  |

Clones are identified by nutrient (G: glucose-limitation, P: phosphate-limitation, and S: sulfate-limitation), by species (“h” denotes a hybrid, “c” denotes *S. cerevisiae*, “u” denotes *S. uvarum*), and the number indicates its derivation from independent populations. The strain number in the Dunham lab strain database is listed for each.

**Supplemental Table 2: Sequencing coverage**

| Strain | Clone<br>(see<br>Table 1,<br>2) | Average<br>Coverage |
|--------|---------------------------------|---------------------|
| YMD139 |                                 | 58.44               |
| YMD140 |                                 | 174.1               |
| YMD129 |                                 | 36.6                |
| YMD130 |                                 | 84.24               |
| YMD366 |                                 | 176.7               |
| YMD35  | Pu1                             | 288.3               |
| YMD92  | Pu2                             | 60.2                |
| YMD18  | Pc3                             | 389.8               |
| YMD77  | Pc1                             | 82.0                |
| YMD66  | Pc4                             | 57.1                |
| YMD98  | Pc2                             | 100.5               |
| YMD30  | Ph1                             | 32.4/28.15          |
| YMD39  | Ph2                             | 39.9/34.1           |
| YMD90  | Ph3                             | 38.4/32.4           |
| YMD101 | Ph5                             | 19.13/17.8          |
| YMD741 | Ph4                             | 63.2/57.5           |
| YMD744 | Ph6                             | 37.4/69.4           |
| YMD723 | Gu1                             | 94.3                |
| YMD725 | Gu2                             | 80.5                |
| YMD34  | Gc2                             | 72.2                |
| YMD23  | Gc1                             | 104.0               |
| YMD726 | Gh1                             | 25.6/47.8           |
| YMD737 | Gh2                             | 35.4/30.9           |
| YMD739 | Gh3                             | 21.2                |
| YMD720 | Su1                             | 43.6                |
| YMD721 | Su2                             | 74.3                |
| YMD31  | Sc3                             | 77.4                |
| YMD83  | Sc2                             | 90.9                |
| YMD105 | Sc1                             | 81.6                |
| YMD21  | Sc4                             | 133.7               |
| YMD751 | Sh2                             | 59.8                |
| YMD752 | Sh3                             | 31.7/29.4           |
| YMD754 | Sh4                             | 33.7/33.0           |
| YMD747 | Sh1                             | 100.1               |
| YMD749 | Sh7                             | 27.6                |
| YMD858 | Sh5                             | 33.5/34.9           |
| YMD861 | Sh6                             | 39.2/35.1           |

Mean sequencing coverage is reported from GATK DepthOfCoverage for each evolved clone and ancestor.

| Primer name                | Primer sequence                                                                      | Purpose                                                        |
|----------------------------|--------------------------------------------------------------------------------------|----------------------------------------------------------------|
| ScPHO84_URA3homF           | CGGAGACAATCATATGGGAGAAGCAATTGGAAGATAGAAAAAAGGTACTCGGTACATAAA<br>GTAACCTGACAGTATTTATA | Replace <i>S. cerevisiae</i> PHO84 with <i>K. lactis</i> URA3  |
| ScPHO84_URA3homR           | TGGAGGAAGTTTGAGAGGGCTTATCGCAATGGTTGTAATGGTTTAAAACTCTTTTCGAT<br>CCATATTATTATGAAAAGAC  | Replace <i>S. cerevisiae</i> PHO84 with <i>K. lactis</i> URA3  |
| SCER_chr13_23602_PHO84F    | TGTCCACAGGTGCCATTGGTTG                                                               | Confirm loss of <i>S. cerevisiae</i> PHO84,<br>gain of URA3    |
| SCER_chr13_24217_PHO84R    | CGCCTTATTCATGTTGTTGGGTATCTTCAC                                                       | Confirm loss of <i>S. cerevisiae</i> PHO84                     |
| SCER_URA3gain_5primeR      | GGCCCAATCACAACCACATCTTAGATAGTTG                                                      | Confirm gain of <i>K. lactis</i> URA3                          |
| SCER_chr13_26112_PHO84F    | GCCTTTCACACGACATTTGGTGCATAAC                                                         | Confirm loss of <i>S. cerevisiae</i> PHO84                     |
| SCER_chr13_26652_PHO84R    | GACTTCAAACGACTCGGTATACTCTGCC                                                         | Confirm loss of <i>S. cerevisiae</i> PHO84,<br>gain of URA3    |
| SCER_URA3gain_3primeF      | GAAATGCTGGATGGGAAGCGTACC                                                             | Confirm gain of <i>K. lactis</i> URA3                          |
| SCER_PHO84amp_chr13_23928F | GTAACCTGACAGTATTTATAGATTATGTAAGGGGTTT                                                | Amplify the <i>S. cerevisiae</i> PHO84<br>allele               |
| SCER_PHO84amp_chr13_26478R | CCATATTATTATGAAAAGACACAACCGGAAGGGG                                                   | Amplify the <i>S. cerevisiae</i> PHO84<br>allele               |
| SUVA_PHO84amp_SCERhomF     | ACAGGATGGCAGAGAGATGTGAGGAAATAATGAAATTAAGAAATTATCGAATAAATAT<br>GTATAATAAATATGTAGCCT   | Replace <i>S. cerevisiae</i> PHO84 with <i>S. uvarum</i> PHO84 |
| SUVA_PHO84amp_SCERhomR     | GAAACTAATTTATCAGCCGCTCGTTTATCAACCGTTATACCAAATTATGAATAAAAAA<br>CTATAGAGCAGAATAATAGA   | Replace <i>S. cerevisiae</i> PHO84 with <i>S. uvarum</i> PHO84 |
| SUVA_lossPHO84_5primeF     | CGCAATCAAACATACCGTTGATACTGATGAC                                                      | Confirm loss of <i>S. uvarum</i> PHO84                         |
| SUVA_new_lossPHO84_5primeR | GAACGATGTCGAATCTTCTCTCCATCTC                                                         | Confirm loss of <i>S. uvarum</i> PHO84                         |
| SUVA_new_lossPHO84_3primeF | CGTGGGCTATAACGACGCTACTG                                                              | Confirm loss of <i>S. uvarum</i> PHO84                         |
| SUVA_lossPHO84_3primeR     | ATCACCAATCACGTGATCTAGTTACCC                                                          | Confirm loss of <i>S. uvarum</i> PHO84                         |
| SUVA_PHO84ampF             | GTATAATAAATATGTAGCCTGACAGTATTTATAGATTATGTACGT                                        | Amplify the <i>S. uvarum</i> PHO84 allele                      |
| SUVA_PHO84ampR             | CTATAGAGCAGAATAATAGACACAACCGGCG                                                      | Amplify the <i>S. uvarum</i> PHO84 allele                      |
| Suva_PHO84_KANMX_F         | AGTTTCTCATTGAACTTTTTGAAATTGATTCAGTAAGC CGACATGGAGGCCAGAATA                           | Replace <i>S. uvarum</i> PHO84 with<br>kanMX                   |
| Suva_PHO84_KANMX_R         | CAGTAAGCCACAACAAACAACAAGAATACATCAAAG CAGTATAGCGACCAGCATTC                            | Replace <i>S. uvarum</i> PHO84 with<br>kanMX                   |
| pIL37_cerPHO84F            | GCCCGGGGATCTCGTAACCTGACAGTATTTATAGATTATG                                             | Cloning <i>S. cerevisiae</i> PHO84 into<br>pIL37 plasmid       |
| pIL37_cerPHO84R            | GAAGTAGTGGATCTCGCCATATTATTATGAAAAGACACAAC                                            | Cloning <i>S. cerevisiae</i> PHO84 into<br>pIL37 plasmid       |
| IL429                      | GTGAGCGCGTAATACGACTC                                                                 | Confirm insertion in pIL37 plasmid                             |
| IL430                      | CACACAGGAAACAGCTATGACCATG                                                            | Confirm insertion in pIL37 plasmid                             |
| 30_chrIV_1055864F          | CAAGAGGCAGTGGCAGACTTGC                                                               | Confirm SNP in evolved hybrid                                  |

|                        |                              |                               |
|------------------------|------------------------------|-------------------------------|
| 30_chrIV_1055864R      | CCGTGGAACGGGATTTGGCAG        | Confirm SNP in evolved hybrid |
| 39_chrV_432778F        | GGACTACAACCAGTTGACGTTG       | Confirm SNP in evolved hybrid |
| 39_chrV_432778R        | CGGCTATCTCGACATATGAGTAGGC    | Confirm SNP in evolved hybrid |
| 741_chrVII_555885F     | GGATGGGTTGTCAGTAGACGGTG      | Confirm SNP in evolved hybrid |
| 741_chrVII_555885R     | GTCGCCCTATGCCTGGATTG         | Confirm SNP in evolved hybrid |
| 741_chrX_246208F       | GTGGTATTCAAGAATGGCGCACC      | Confirm SNP in evolved hybrid |
| 741_chrX_246208R       | GACTCCGAGTGAGCTTCGACATC      | Confirm SNP in evolved hybrid |
| 744_chrVII_972813F     | GCGGTGGCATCAATGTAGTCAACC     | Confirm SNP in evolved hybrid |
| 744_chrVII_972813R     | GATTCTCCAGGTATGAATGCCGCTG    | Confirm SNP in evolved hybrid |
| 726_chrXIII_852028F    | CGGGTAACGAAGAATCGACTCTCGC    | Confirm SNP in evolved hybrid |
| 726_chrXIII_852028R    | GCGGAATAACCTAACACGTGGAGG     | Confirm SNP in evolved hybrid |
| 737_chrIV_111919F      | GATACGACAGGTAGCATACGAACCCC   | Confirm SNP in evolved hybrid |
| 737_chrIV_111919R      | GTGATTCTCTCCAGCACCTACCTG     | Confirm SNP in evolved hybrid |
| 737_chrIII_51593F      | GGATGTCGTGCAATTGTACCAGGAG    | Confirm SNP in evolved hybrid |
| 737_chrIII_51593R      | GCTTGAGCTCATTATCGAAGGACCC    | Confirm SNP in evolved hybrid |
| 749_chrII_238875F      | GCAAGAAGATCTGGCAAGCTACAAGG   | Confirm SNP in evolved hybrid |
| 749_chrII_238875R      | CGTCGCTACAGAAGGCTTTGGTTG     | Confirm SNP in evolved hybrid |
| 749_chrXVI_490631F     | CCAATGCAGTGCGCTTATTGGTTG     | Confirm SNP in evolved hybrid |
| 749_chrXVI_490631R     | GGCGAAAGTAAGTCCAGCACTGAG     | Confirm SNP in evolved hybrid |
| 749_chrXVI_86106F      | CTGGTAGTCAACCATCCCAGATG      | Confirm SNP in evolved hybrid |
| 749_chrXVI_86106R      | GGGCAGCAACCCTAAACTGCTG       | Confirm SNP in evolved hybrid |
| 751_chrVII_936384F     | CATGCTCGTTTCCATATGACCAGG     | Confirm SNP in evolved hybrid |
| 751_chrVII_936384R     | GCATAGAACTTCGGAGGTCAATGGG    | Confirm SNP in evolved hybrid |
| 752_chrVI_162998F      | GGAATTGACCCGGTGATACGTCCAAG   | Confirm SNP in evolved hybrid |
| 752_chrVI_162998R      | GCCCACAAGACCATATCTGTGACC     | Confirm SNP in evolved hybrid |
| 754_chrXIV_666675F     | GAATTGAGCTCTCAGTCTTAAAGCGACC | Confirm SNP in evolved hybrid |
| 754_chrXIV_666675R     | CTGGGACGATATCAACGAGCAATCC    | Confirm SNP in evolved hybrid |
| 754_chrXV_800832F      | CTGCTGTTGGCACTGATATGCC       | Confirm SNP in evolved hybrid |
| 754_chrXV_800832R      | CCCAGCAAGGCGATGATTCTAACTTC   | Confirm SNP in evolved hybrid |
| 754_chrIV_259517F      | CCTTAGCCTGCTCACTACTTAGAAGTTG | Confirm SNP in evolved hybrid |
| 754_chrIV_259517R      | CCAGCTCTGTTTGAATGTGCCTCC     | Confirm SNP in evolved hybrid |
| 861_chrV_269392F       | TACGTCGTCTACAGTTGGACAGGC     | Confirm SNP in evolved hybrid |
| 861_chrV_269392R       | GTGGTTCCAGATGTGCCAACTGTG     | Confirm SNP in evolved hybrid |
| 861_chrXIV_746688F     | AACTGGTCTTTGGCAAATGGCTCC     | Confirm SNP in evolved hybrid |
| 861_chrXIV_746688R     | CAGACACAGTTTTTCAGCGATGCCC    | Confirm SNP in evolved hybrid |
| 39_uva_chrVII_9524F    | GGCGCCTAATGTGGAAGAAGATGAC    | Confirm SNP in evolved hybrid |
| 39_uva_chrVII_9524R    | GTCTTGATGCTGGTAGGCAGGTG      | Confirm SNP in evolved hybrid |
| 39_uva_chrXVI_232879F  | CTAAGACCGTTCCCCTCCTAAGC      | Confirm SNP in evolved hybrid |
| 39_uva_chrXVI_232879R  | GCCACCAGTTAGCTATATCTTTCGCTG  | Confirm SNP in evolved hybrid |
| 39_uva_chrXIII_194496F | GATTCACCACGCCTAAGCTCTTGAG    | Confirm SNP in evolved hybrid |
| 39_uva_chrXIII_194496R | GTTGTCAAGGAATTGCCAAAGCC      | Confirm SNP in evolved hybrid |

|                         |                              |                               |
|-------------------------|------------------------------|-------------------------------|
| 39_uva_chrIV_244399F    | GAACCGACCTAGCTTCAACCCTTC     | Confirm SNP in evolved hybrid |
| 39_uva_chrIV_244399R    | ATACGATGTCAGCCTCGCAGGAG      | Confirm SNP in evolved hybrid |
| 101_uva_chrXIII_231731F | GGATCATCGAAGGCGGTAGATCG      | Confirm SNP in evolved hybrid |
| 101_uva_chrXIII_231731R | CACAAACCCTCCTGCACACCTTTC     | Confirm SNP in evolved hybrid |
| 741_uva_chrXIII_324121F | GTCCATAGCACGCTGTGCTTCTG      | Confirm SNP in evolved hybrid |
| 741_uva_chrXIII_324121R | GAGCATGGTAGACTGAACCAGTTTCAG  | Confirm SNP in evolved hybrid |
| 749_uva_chrII_273296F   | GTGGCTTGTCCATGAGATGCAACAG    | Confirm SNP in evolved hybrid |
| 749_uva_chrII_273296R   | CCACTCCGTGAGACCCAATCTTC      | Confirm SNP in evolved hybrid |
| 752_uva_chrXIV_495890F  | GTGACGGTACATGTGGTACGAACC     | Confirm SNP in evolved hybrid |
| 752_uva_chrXIV_495890R  | CGCGACTATGATTACACAGGCCATAC   | Confirm SNP in evolved hybrid |
| 754_uva_chrV_342563F    | GCCAATTCGGTACTTCCTTCTGAGC    | Confirm SNP in evolved hybrid |
| 754_uva_chrV_342563R    | GAATCGAGTGCCTAGCCGAGAGC      | Confirm SNP in evolved hybrid |
| 754_uva_chrX_769768F    | CTGTCCTGGAGACTTTCAGATTCGG    | Confirm SNP in evolved hybrid |
| 754_uva_chrX_769768R    | GCTGTCTTCGCCTTCGTCTGTAC      | Confirm SNP in evolved hybrid |
| 754_uva_chrX_990873F    | CACCATGACTGTCGCTATGTCAAACG   | Confirm SNP in evolved hybrid |
| 754_uva_chrX_990873R    | CACATTGGTACATGGTTCGGTGCTC    | Confirm SNP in evolved hybrid |
| 754_uva_chrXII_192491F  | AAAGCAGTACTCGACATGCGGC       | Confirm SNP in evolved hybrid |
| 754_uva_chrXII_192491R  | CTGACAGGGATGCTGGTGACAAG      | Confirm SNP in evolved hybrid |
| 754_uva_chrXIV_19697F   | CGGGTCGTTCCCTCAAGAGTC        | Confirm SNP in evolved hybrid |
| 754_uva_chrXIV_19697R   | GGGACAGATTGACAGGTTTCATTGAAGG | Confirm SNP in evolved hybrid |
| 858_uva_chrIV_310881F   | CAACAGGGGAAGGTTGCCTATGAC     | Confirm SNP in evolved hybrid |
| 858_uva_chrIV_310881R   | CAATGTCGGTAAGTGAACAGGACCC    | Confirm SNP in evolved hybrid |
| 858_uva_chrVIII_16911F  | GCCTCCTTCATAGCCCTGCTTTC      | Confirm SNP in evolved hybrid |
| 858_uva_chrVIII_16911R  | CCCGAATCCACCCTCTTACCATAC     | Confirm SNP in evolved hybrid |
| 861_uva_chrIV_413046F   | GTTAGACCGATCCAGCAGGAGC       | Confirm SNP in evolved hybrid |
| 861_uva_chrIV_413046R   | GAACCTATTCCTAAGCAGGGTCCG     | Confirm SNP in evolved hybrid |
| 739_uva_chrII_889421F   | GAAGGTCGAGGCAGATCTATCCACC    | Confirm SNP in evolved hybrid |
| 739_uva_chrII_889421R   | GCGTAGGTGCAGAAACCACCC        | Confirm SNP in evolved hybrid |

**Supplemental Table 3: Primers used**

Primers used for allele replacements and SNP confirmation in evolved hybrid clones.

# Supplementary Figure 1

A

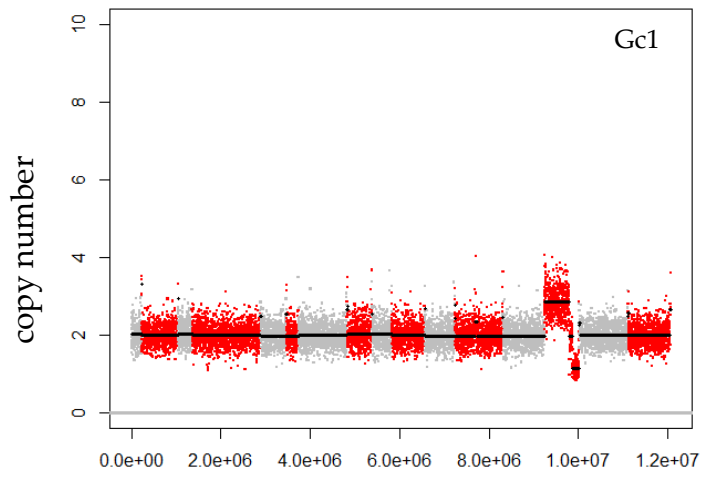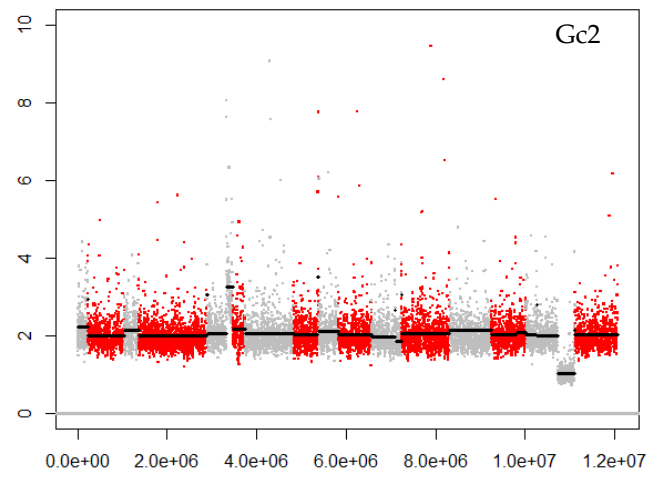

B

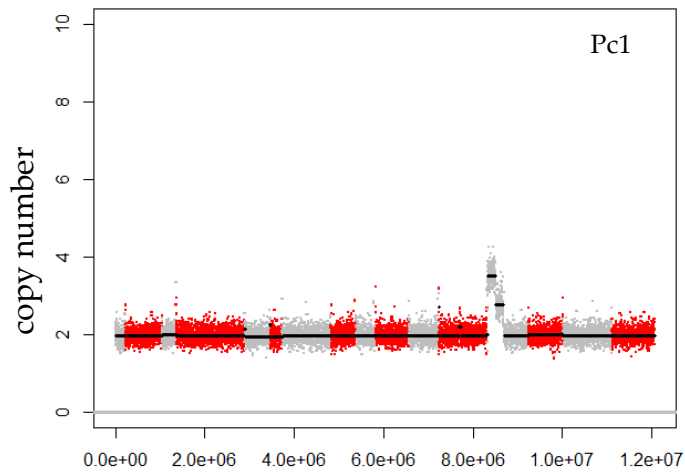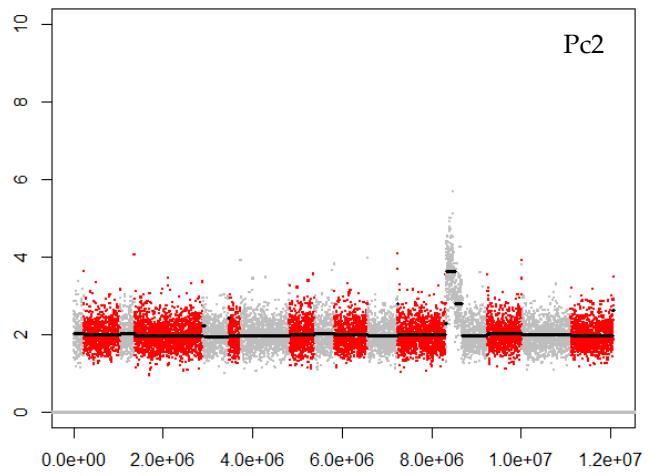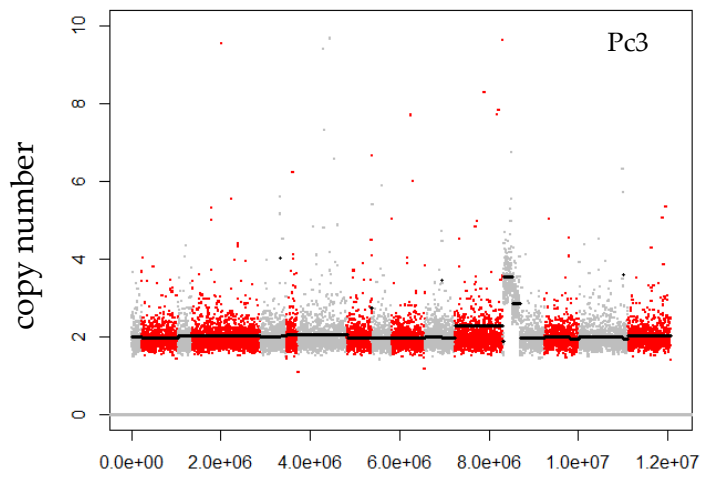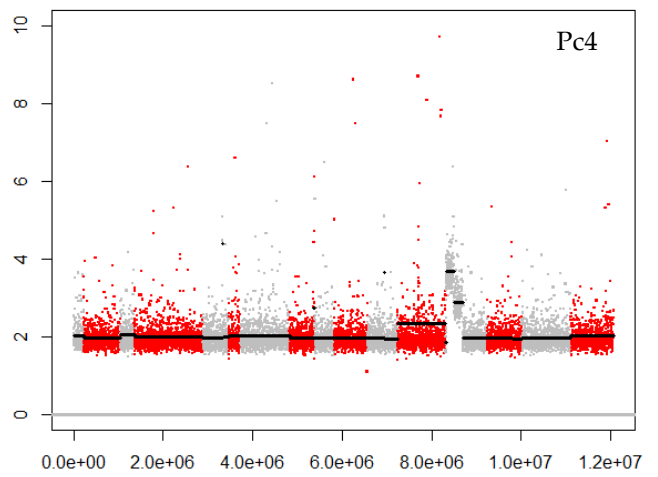

Genomic Position (bp)

C

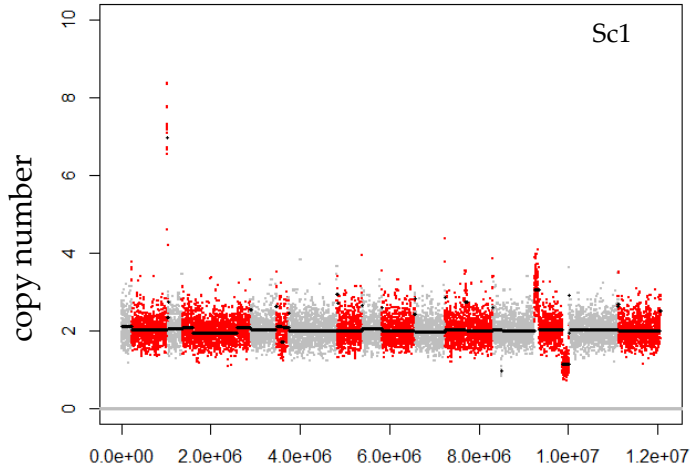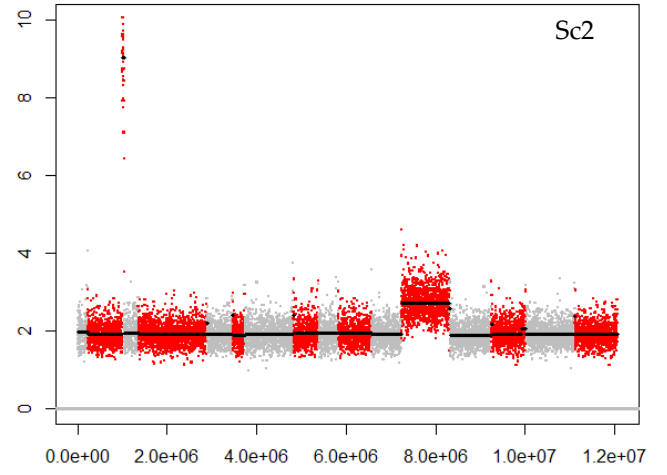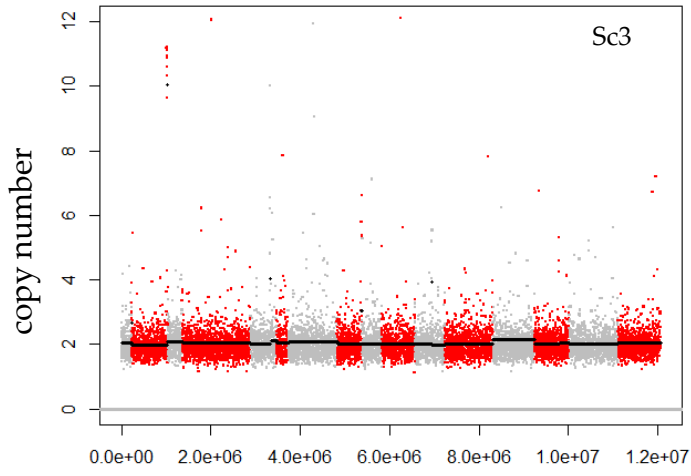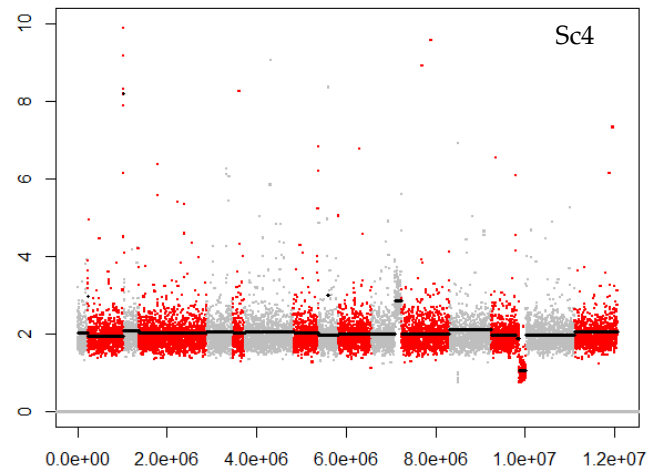

Genomic Position (bp)



# A Supplementary Figure 2

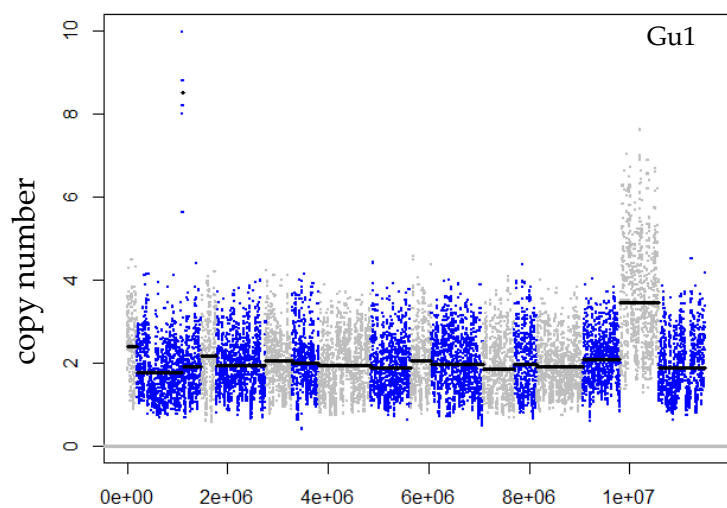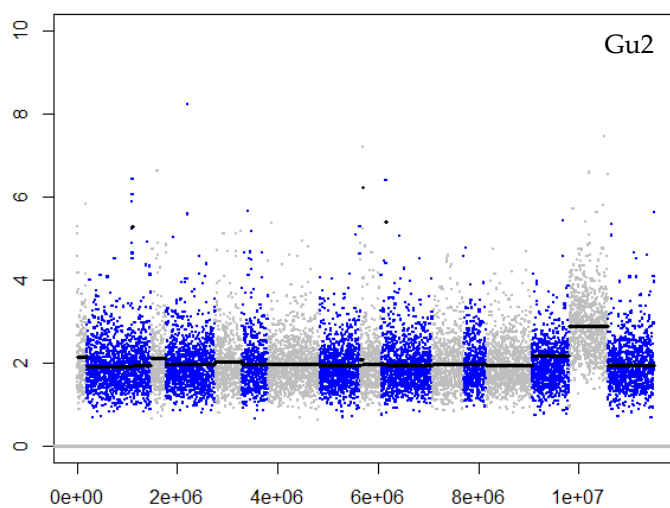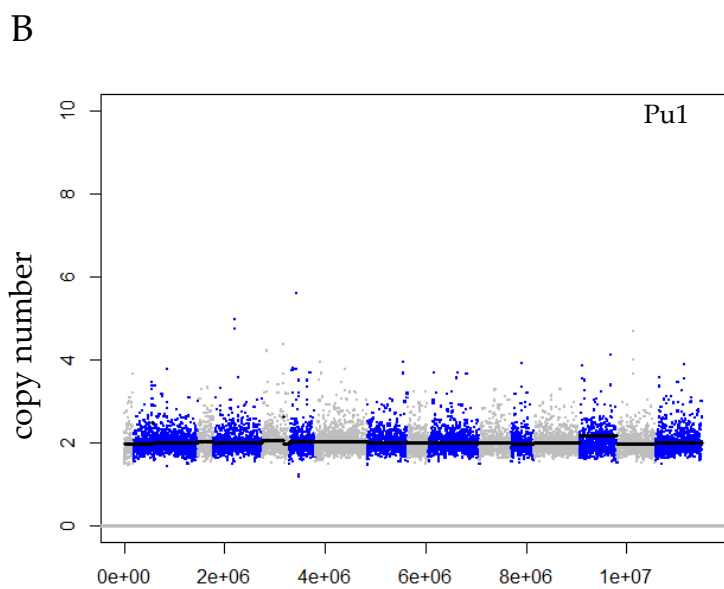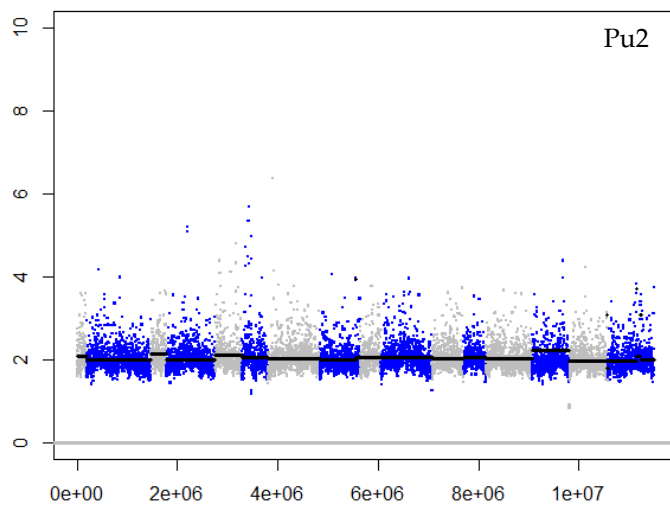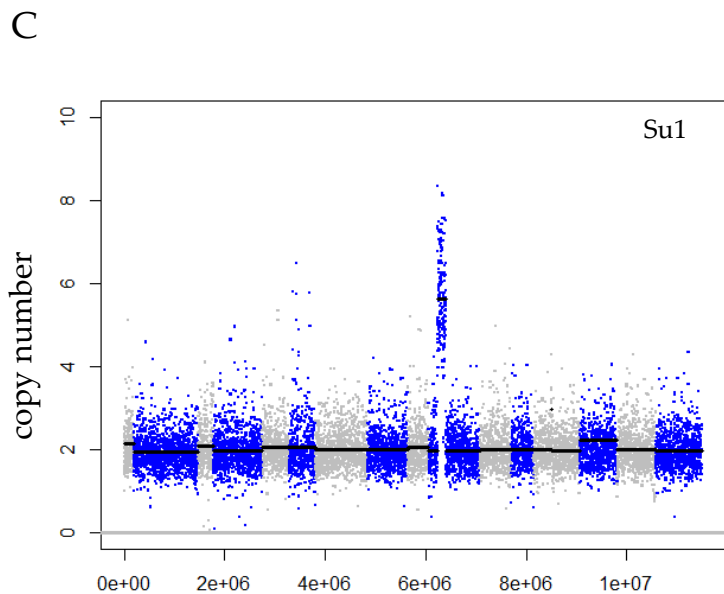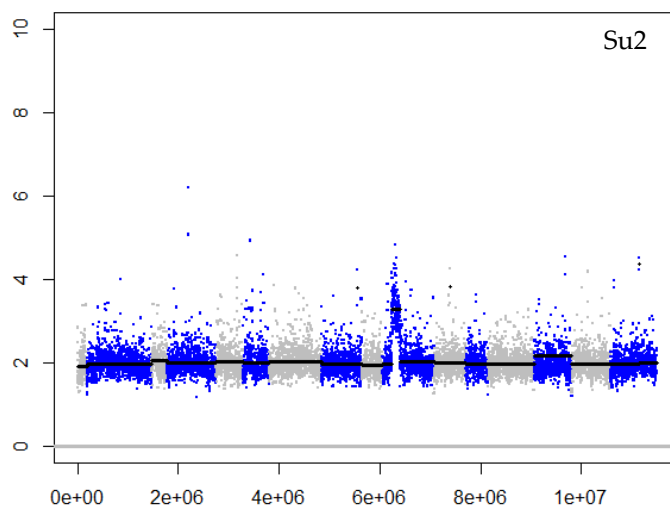

Genomic Position (bp)

# Supplementary Figure 3

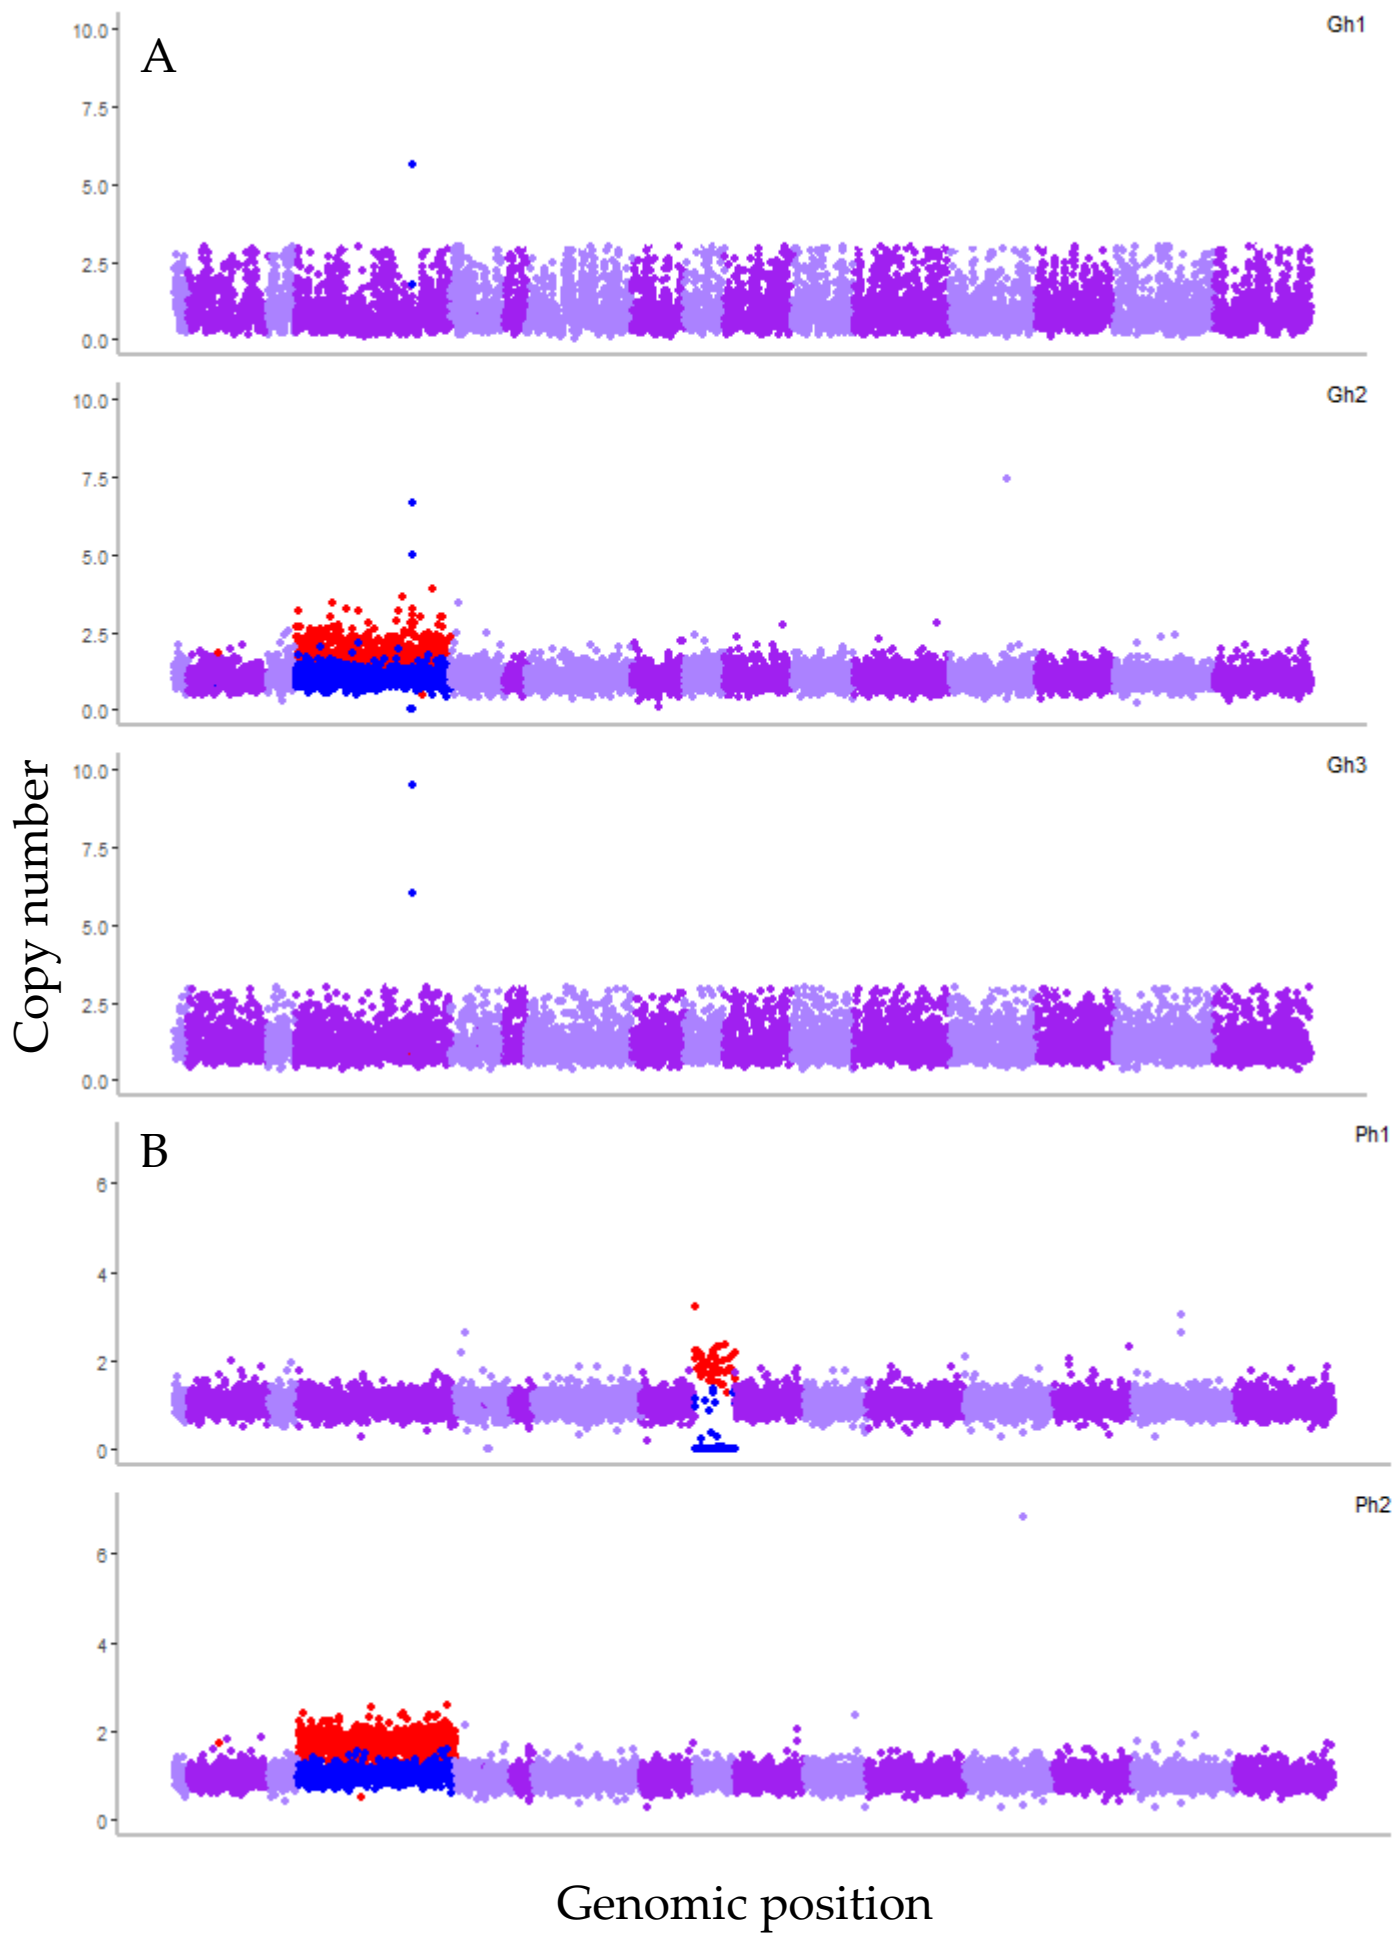

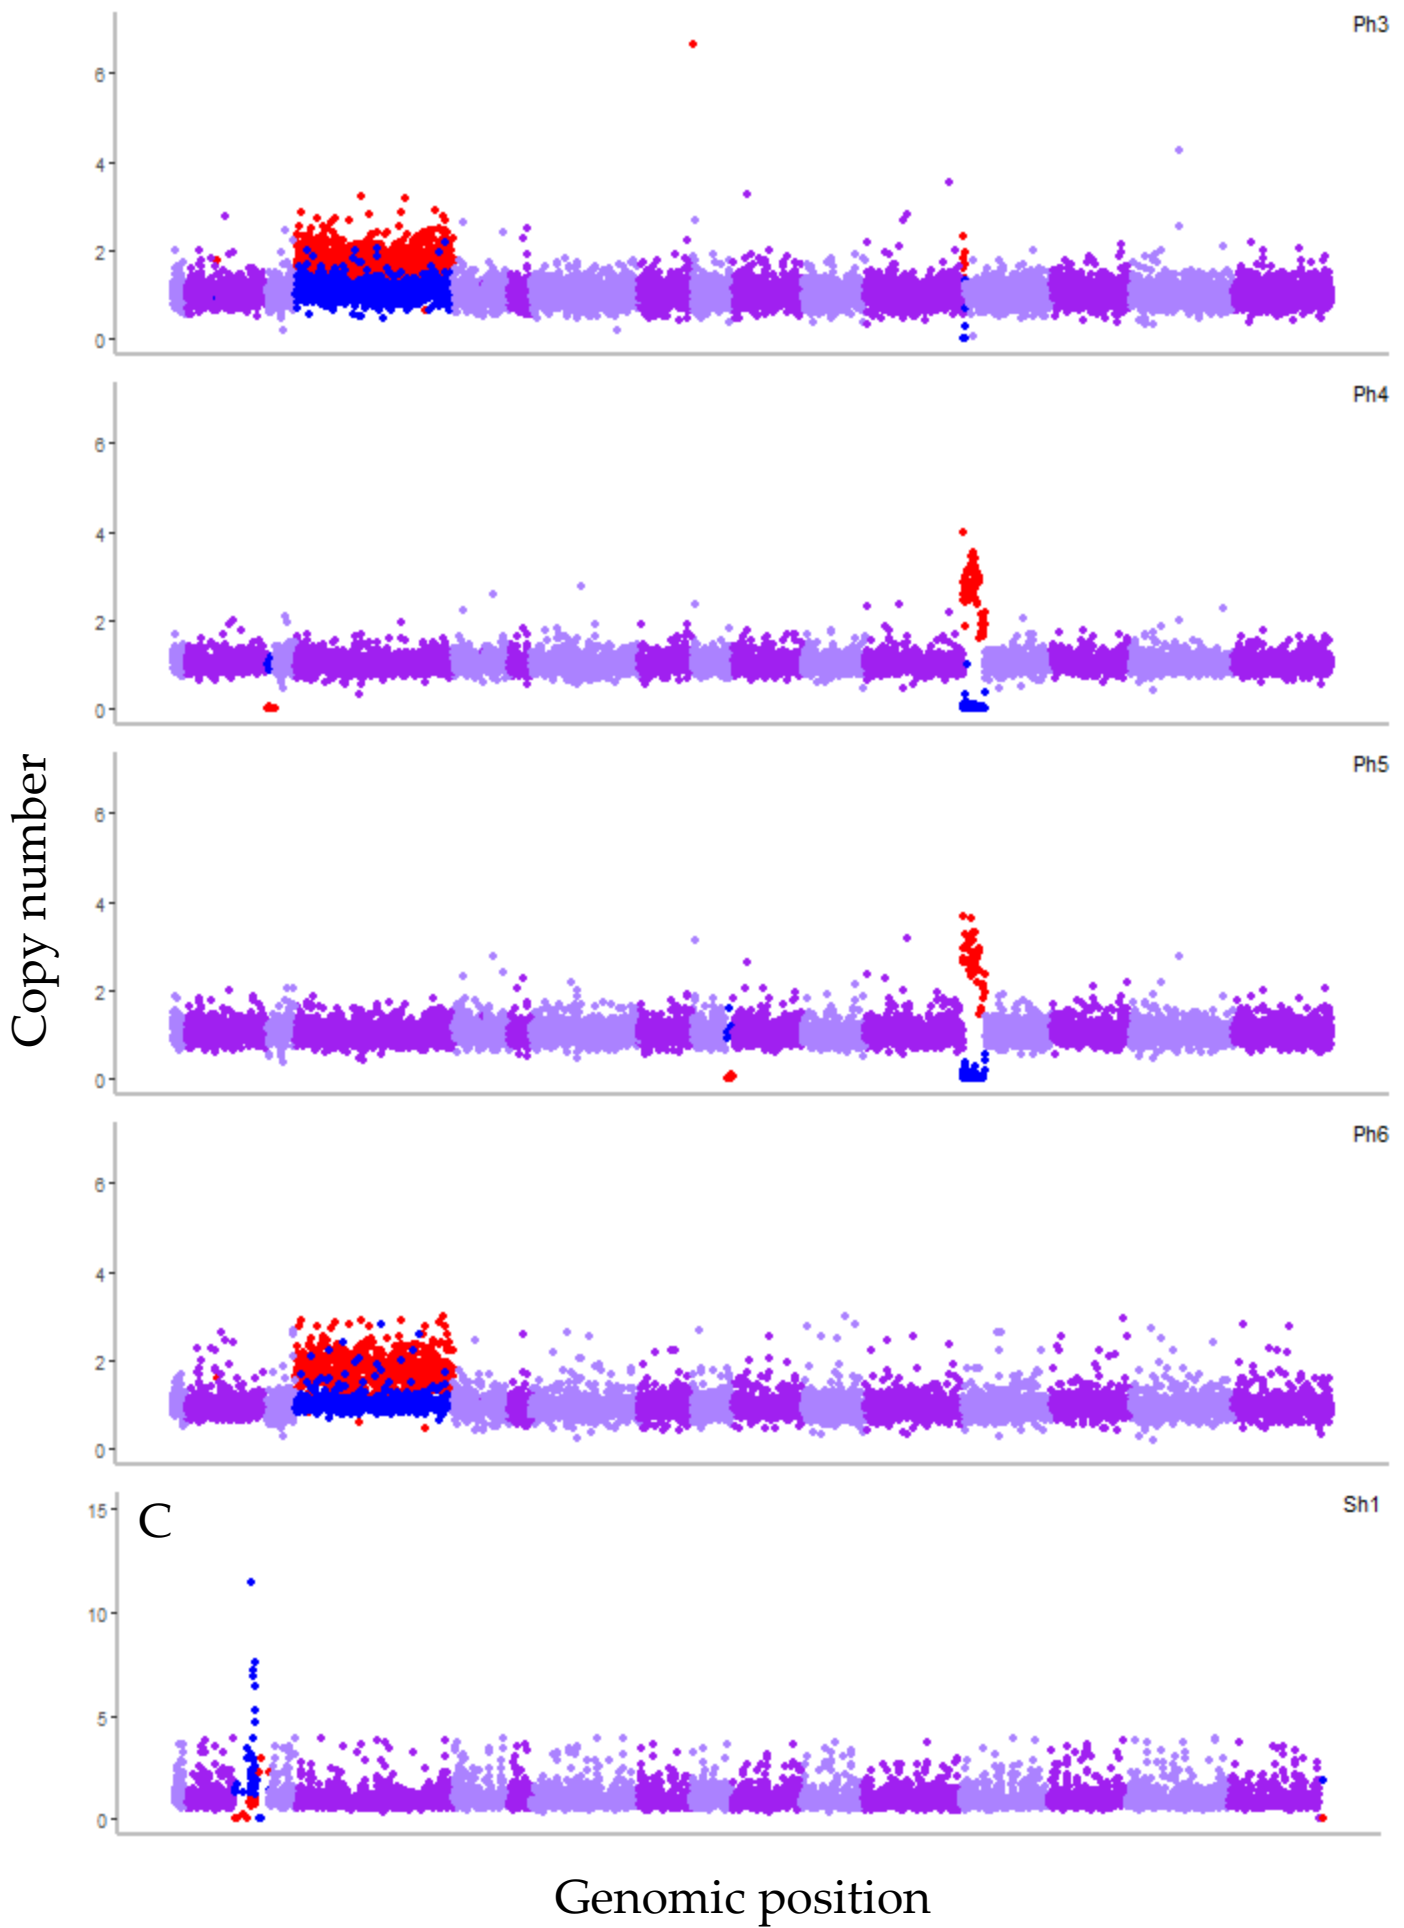

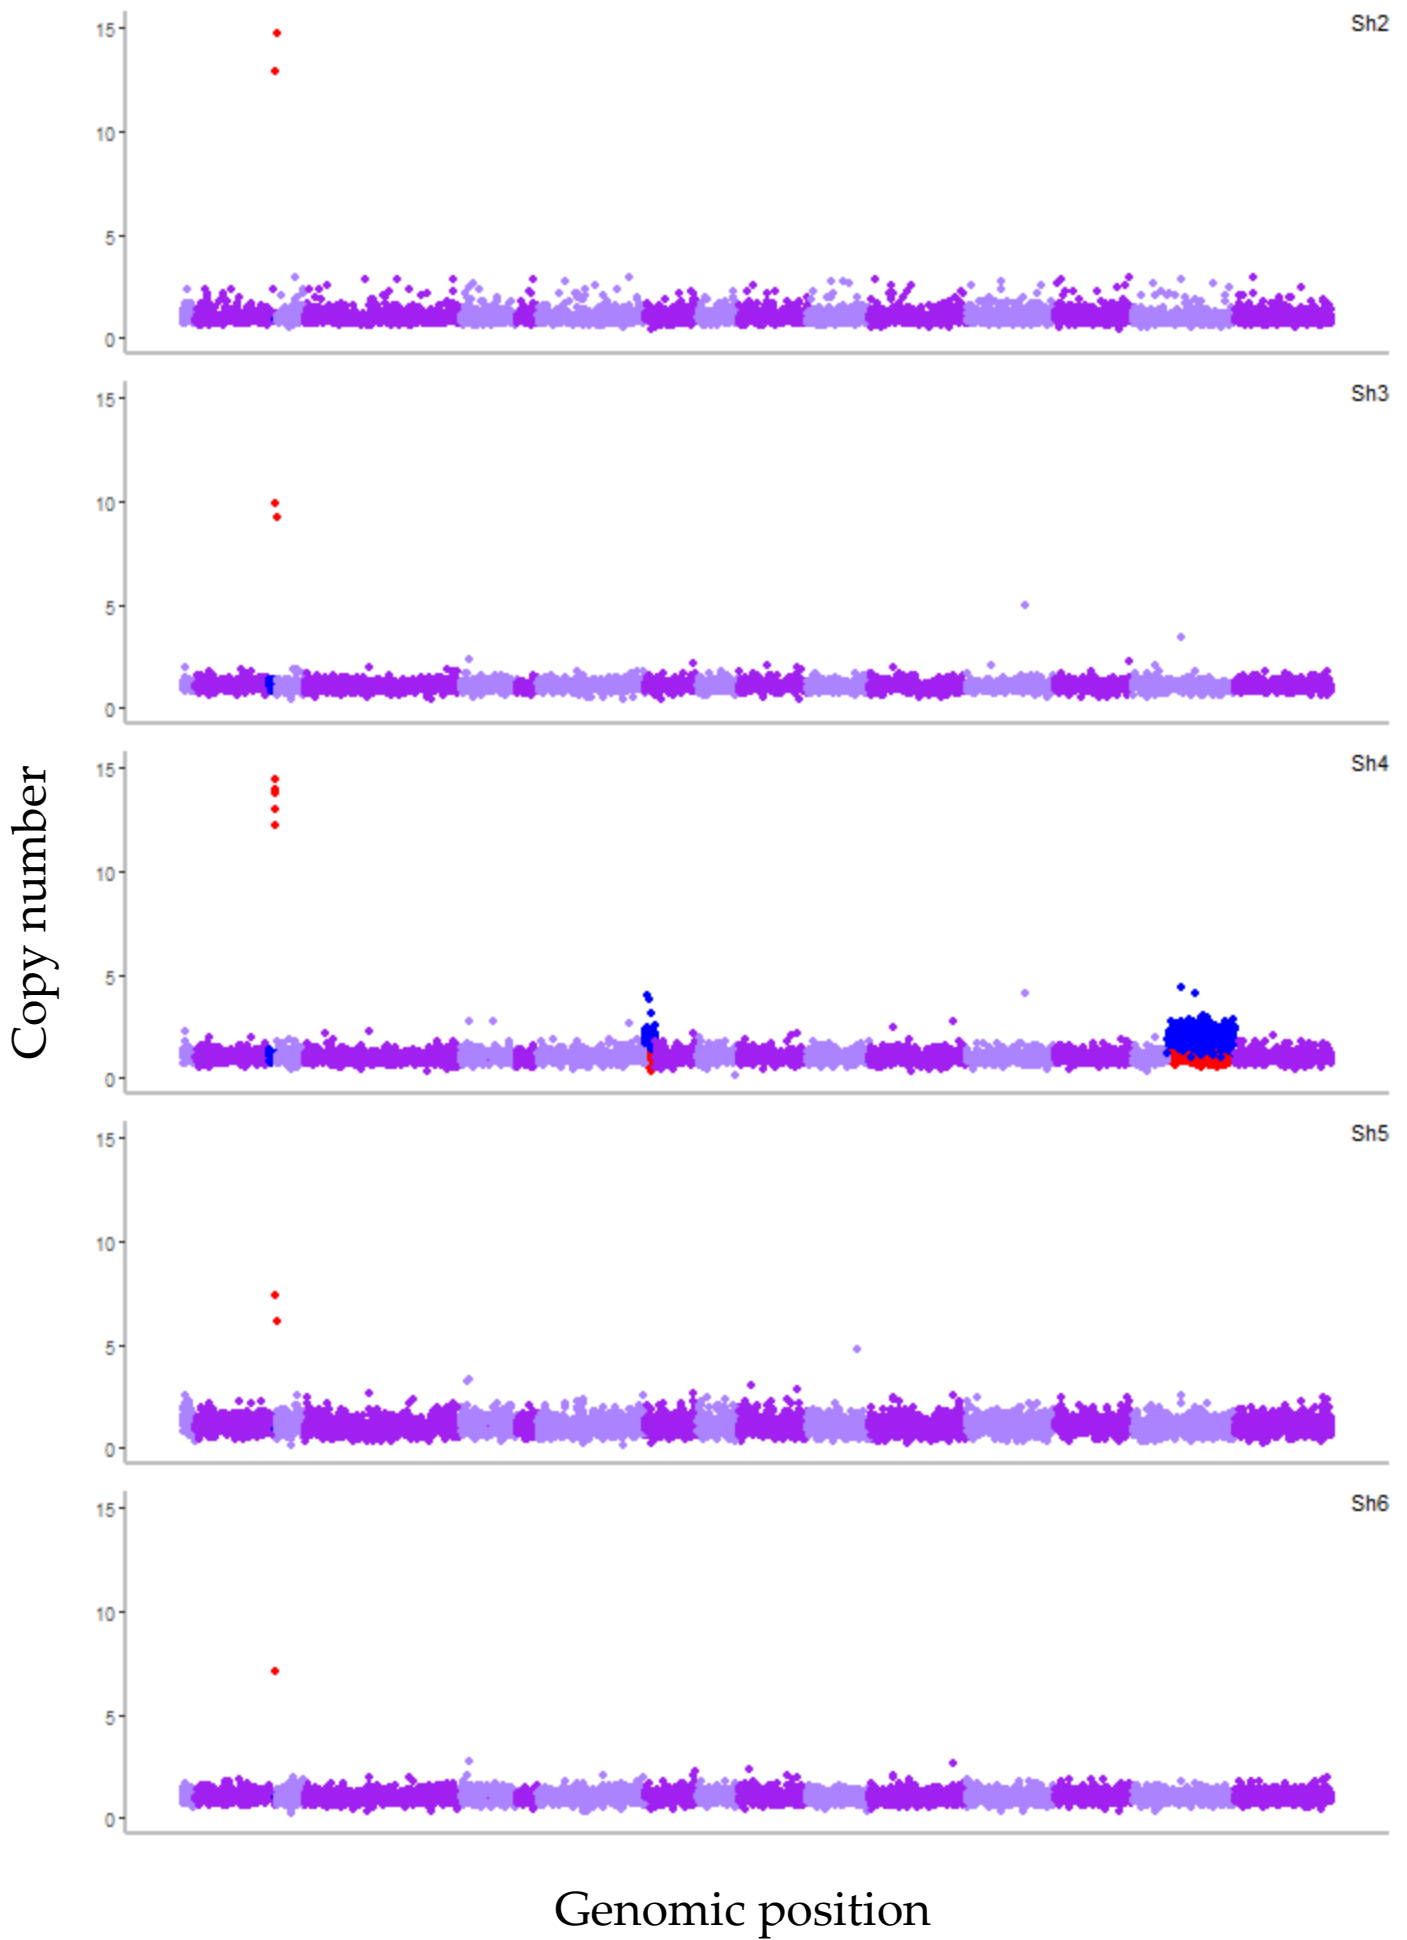

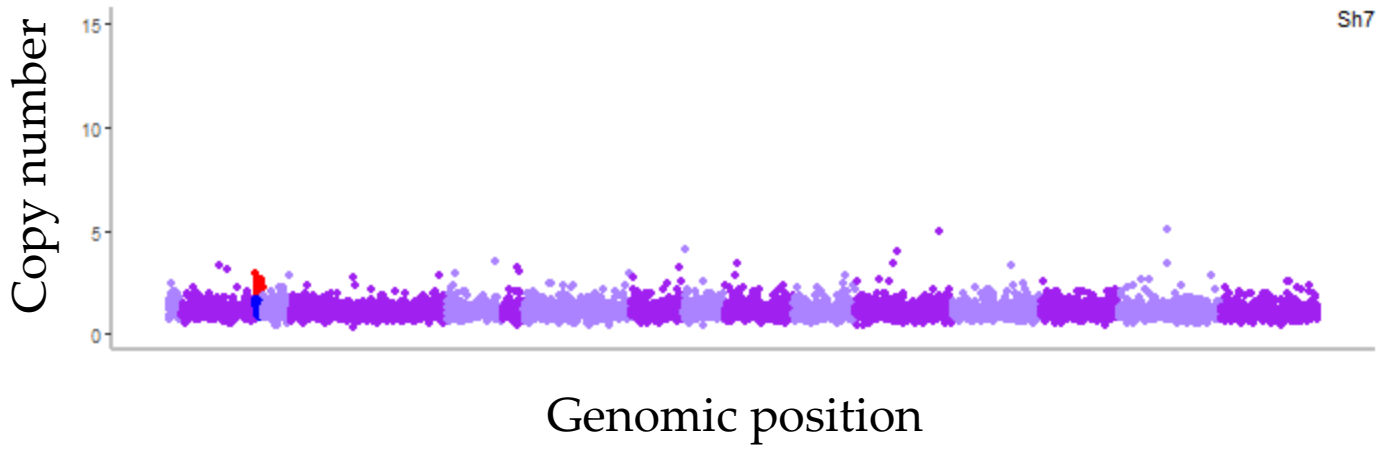

# Supplementary Figure 4

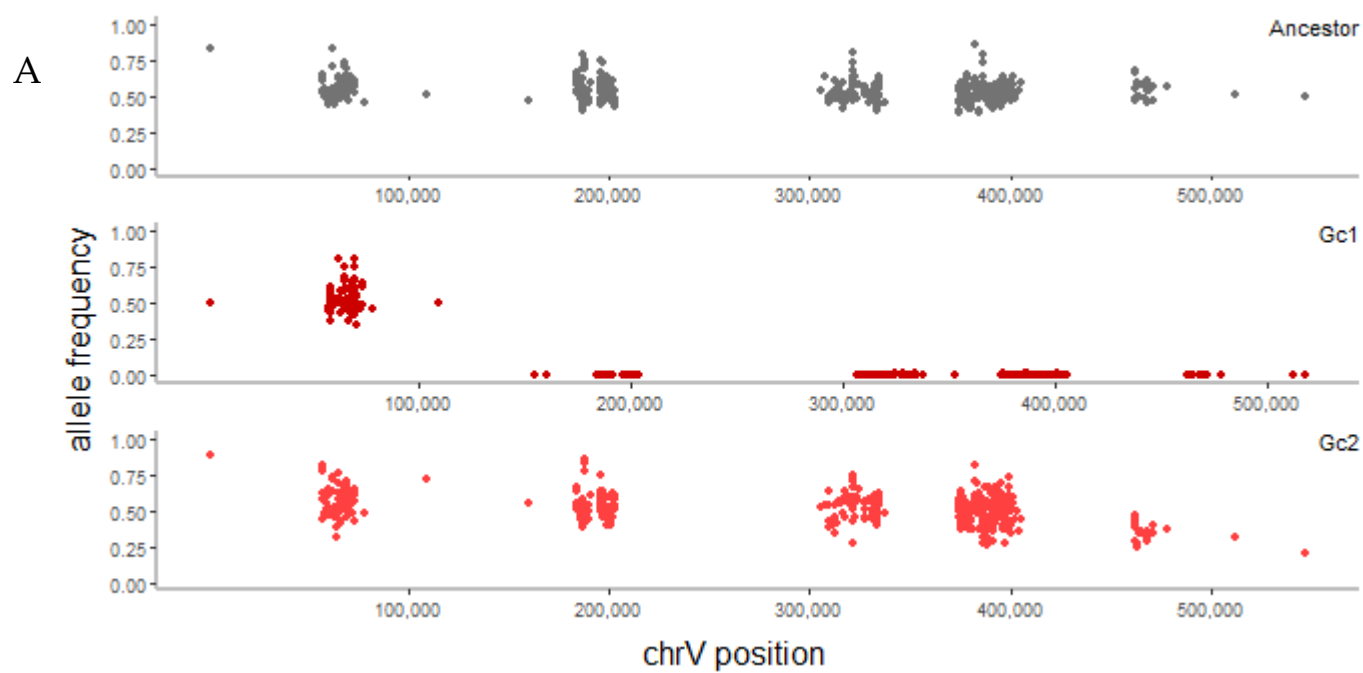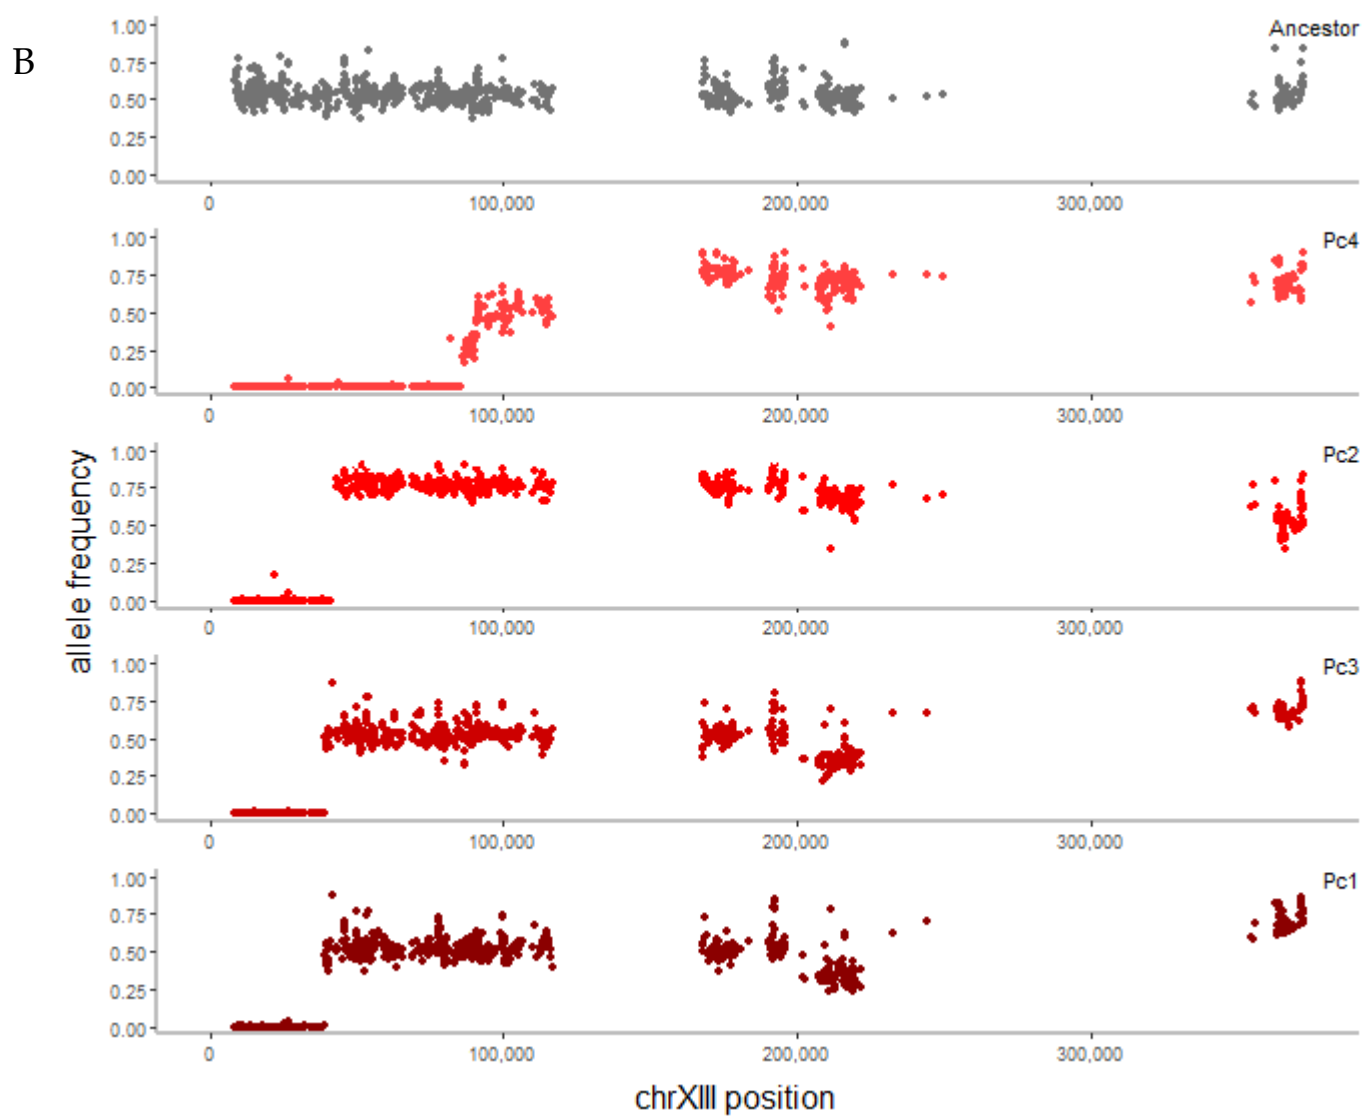

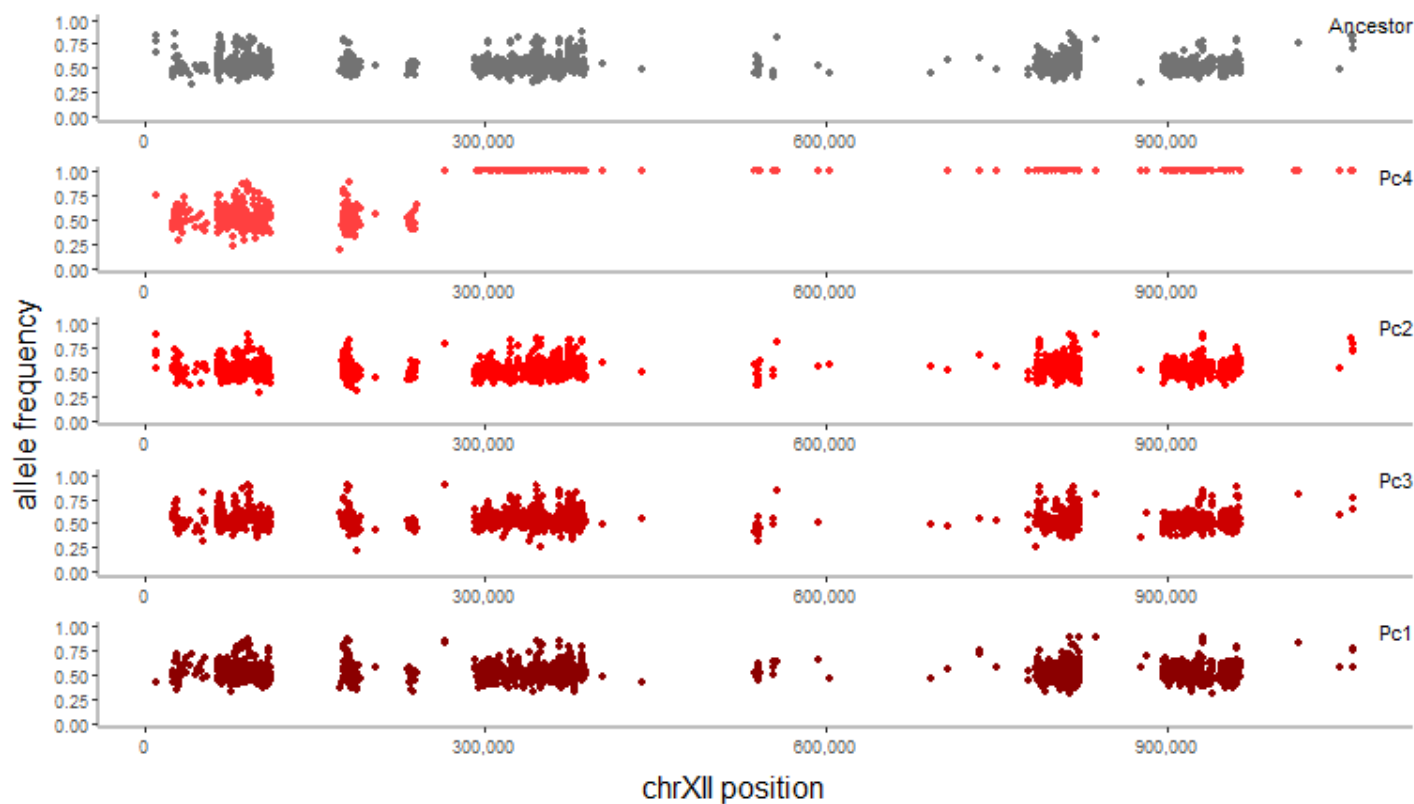

C

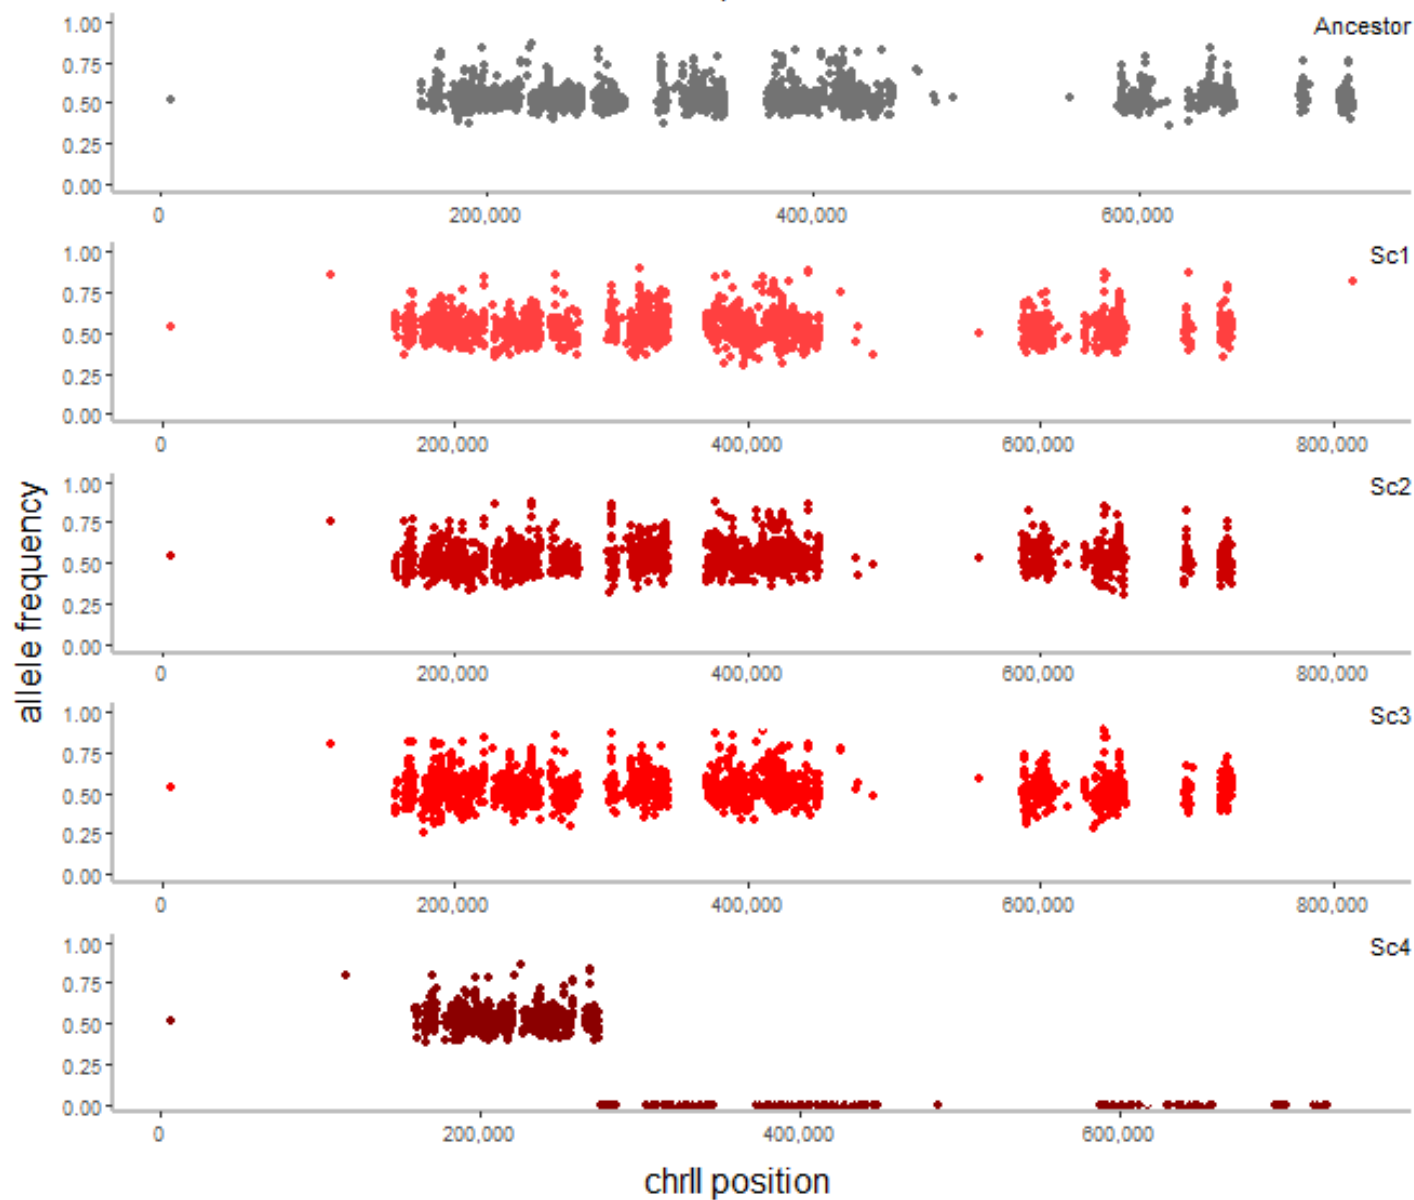

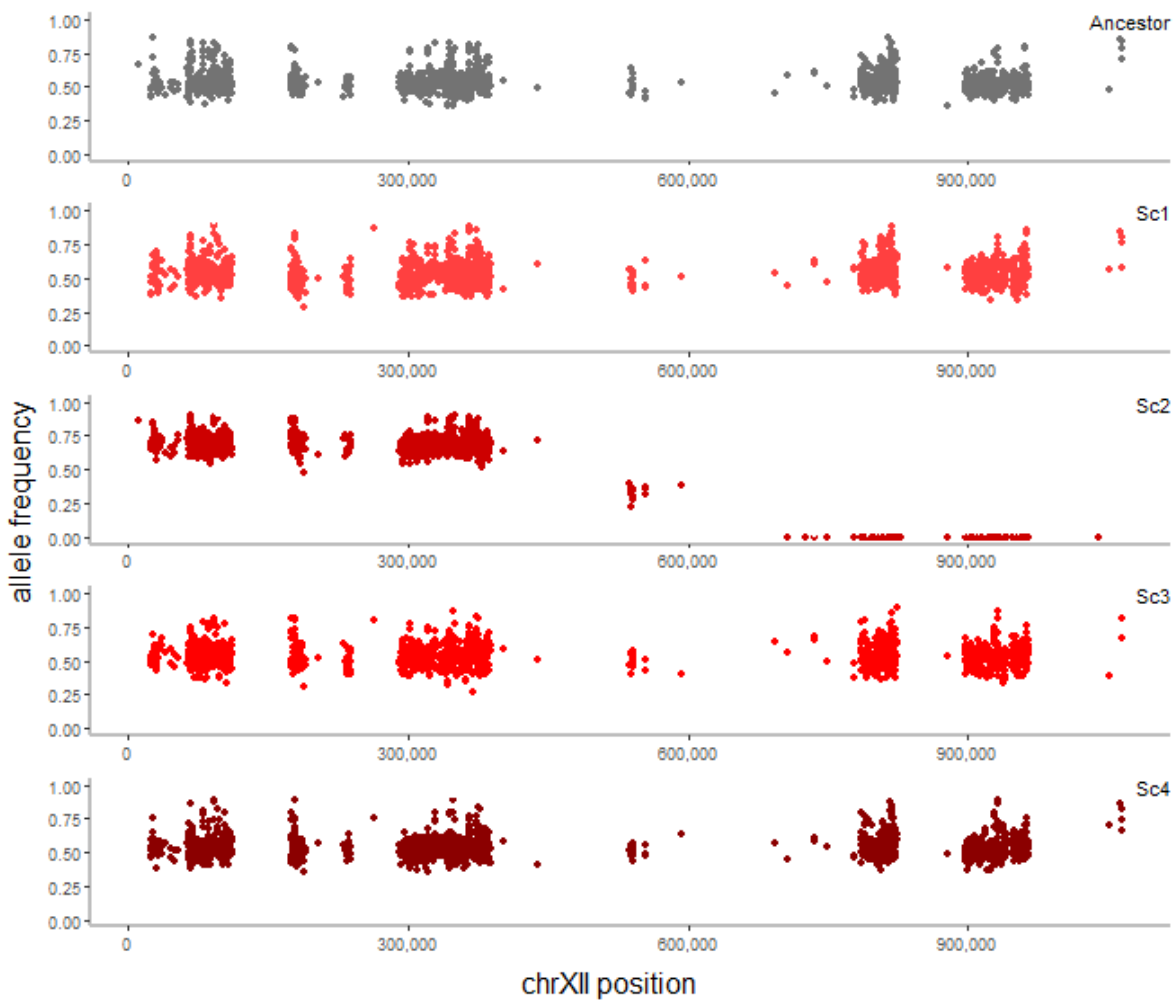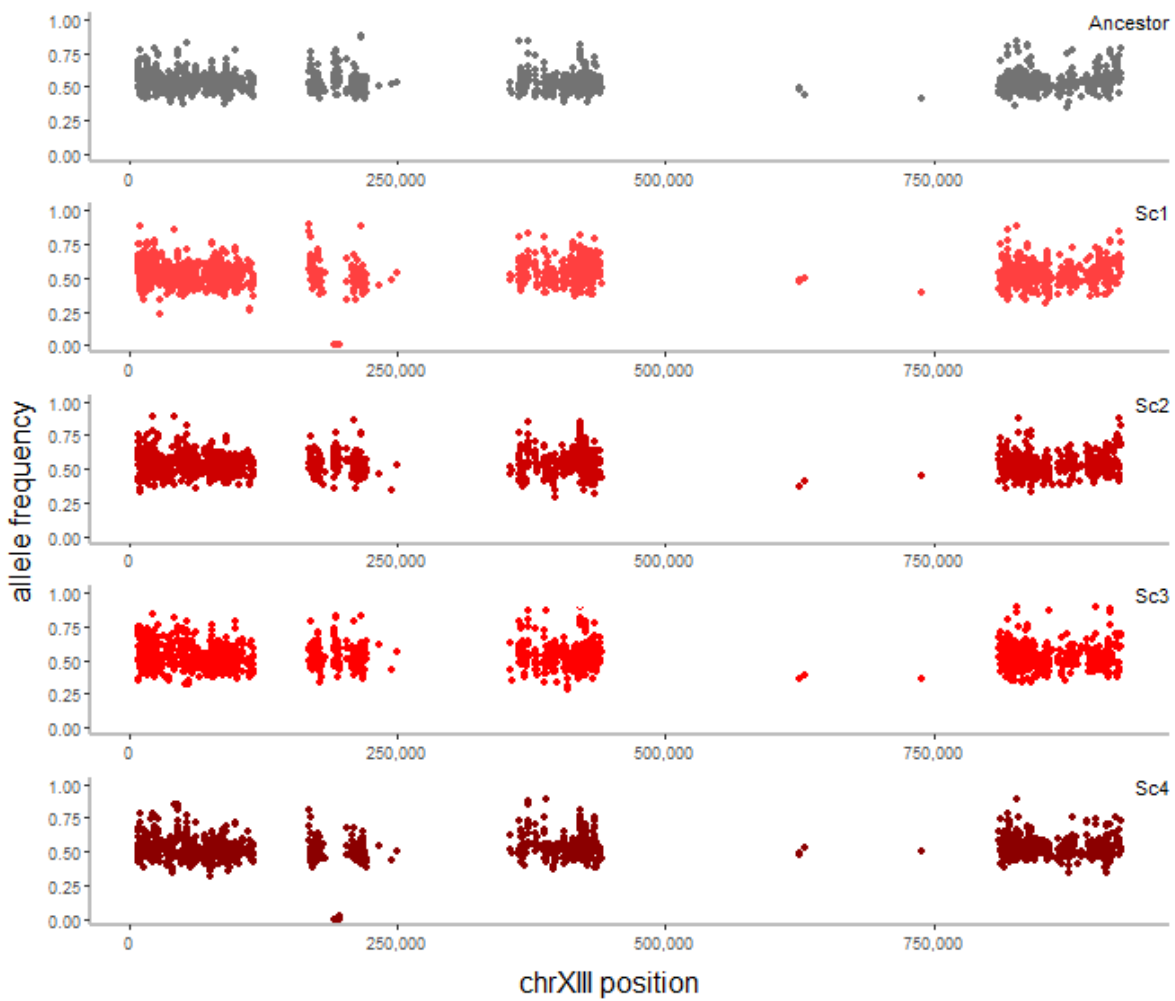



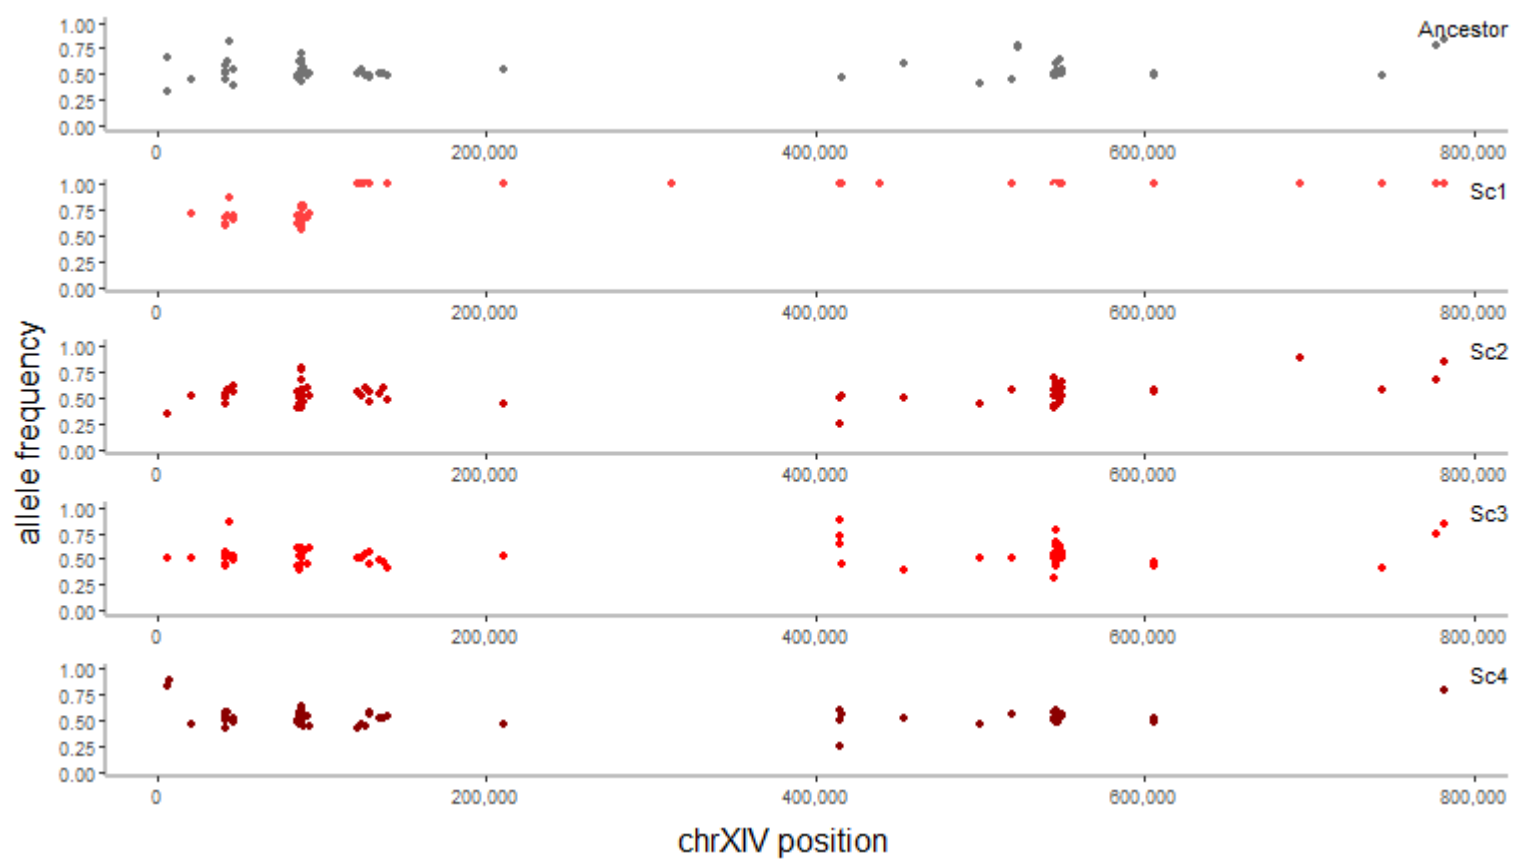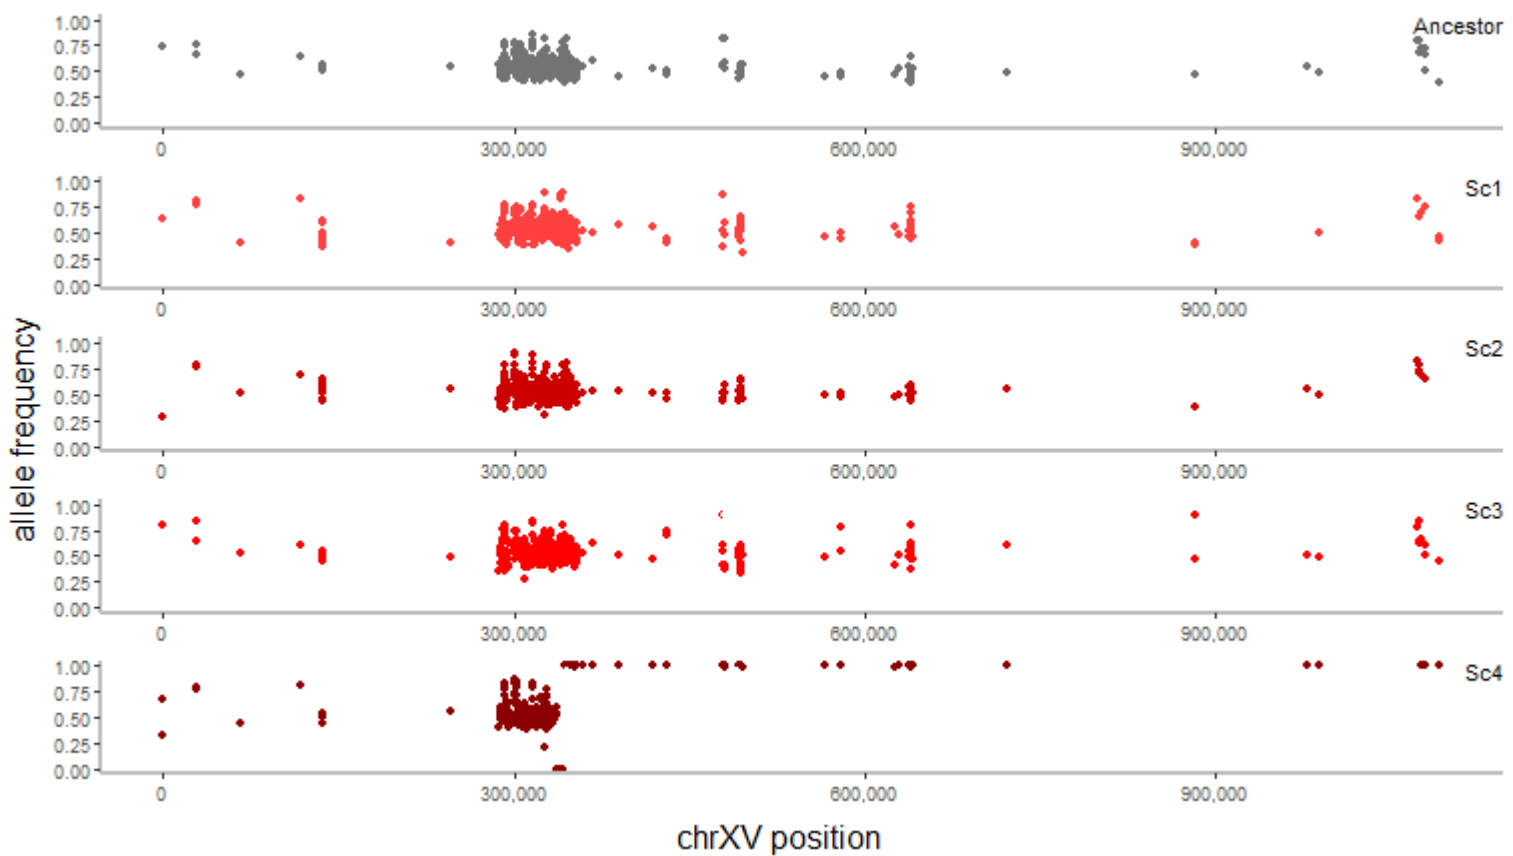

Supplementary Figure 5

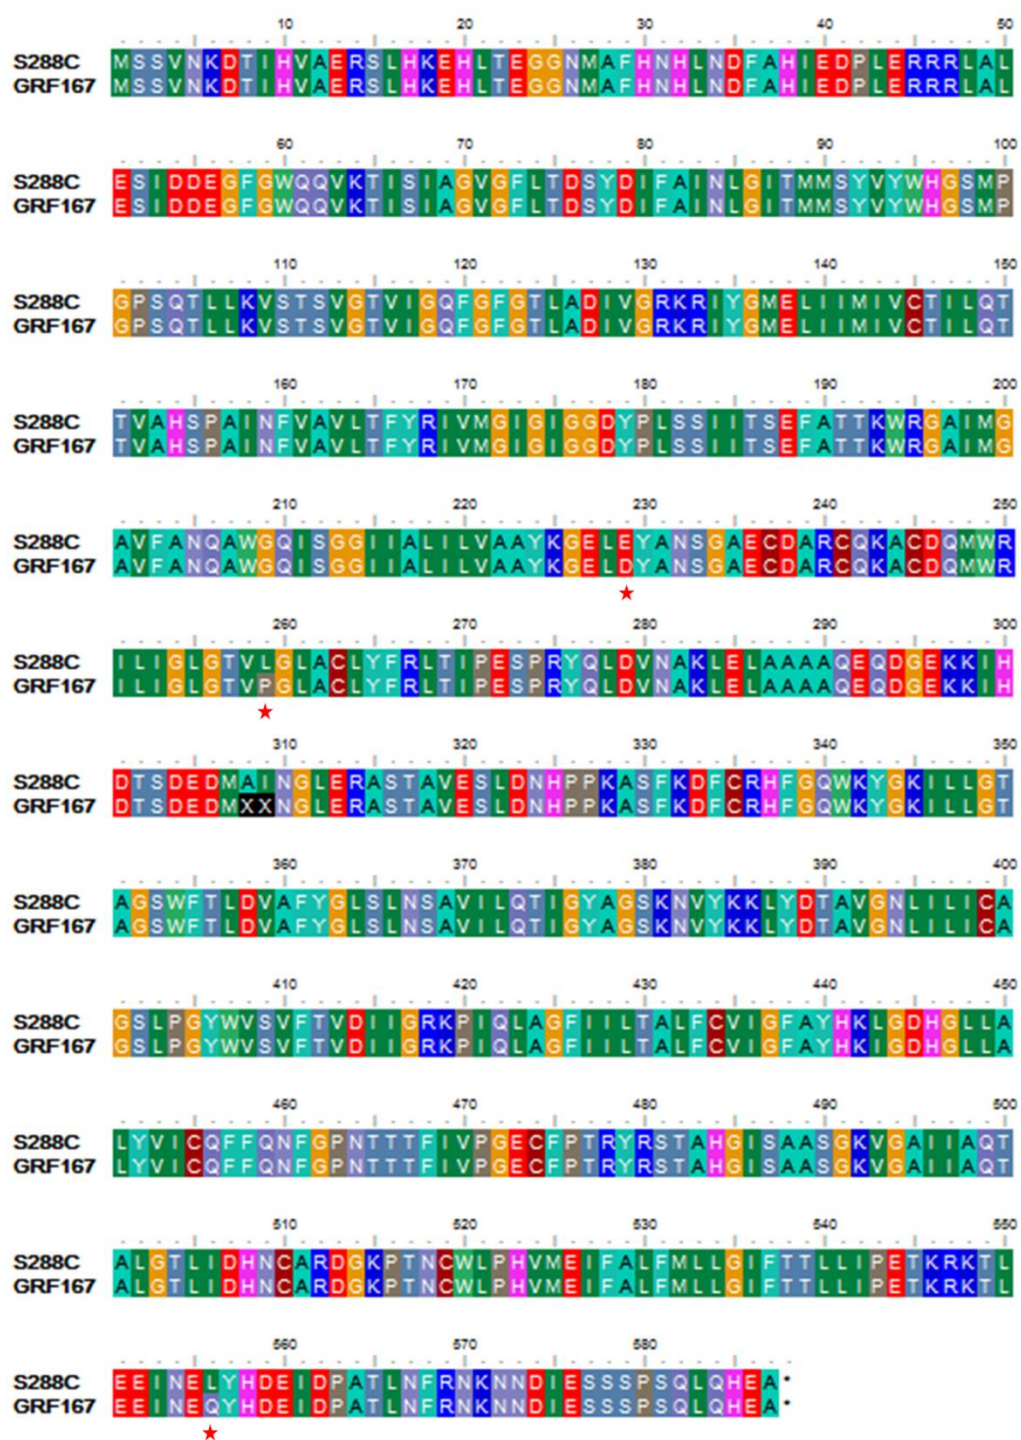

```

      10      20      30      40      50      60      70      80
S288C  ATGAGTTCCGTCAAATAAAGATACATTCATGTTGCTGAAAGAAGCTTTCATAAAAGAACCTTACCGAAGGTGGTAAACAT
GRF167  ATGAGTTCCGTCAAATAAAGATACATTCATGTTGCTGAAAGAAGCTTTCATAAAAGAACCTTACCGAAGGTGGTAAACAT
UVA     ATGAGTTCCGTTGCTAAAAGATAATATTAGTATTGCTGAAAGAAGCTTTCACAGGGAAAACCTGACTGAAGGTGGTAAACCT
      M S S V N K D T I H V A E R S L H K E H L T E G G N M
      M S S V N K D T I H V A E R S L H K E H L T E G G N M
      M S S V A K D N I S I A E R S L H R E N L T E G G N L

      90      100     110     120     130     140     150     160
S288C  GGCCTTCCACAACCAATTTGAATGATTTTGCATATTGAAGATCCTCTGGAAAAGAAGAGATTGGCTTTGGAGTCCATCCG
GRF167  GGCCTTCCACAACCAATTTGAATGATTTTGCATATTGAAGATCCTCTGGAAAAGAAGAGATTGGCTTTGGAGTCCATCCG
UVA     GGCCTTCCACAATTCATTTGAATGATTTGCCCCATATCGAAGATCCTTTGGAAAAGAAGAGATTGGCTTTGCAATCCATTCG
      A F H N H L N D F A H I E D P L E R R R L A L E S I
      A F H N H L N D F A H I E D P L E R R R L A L E S I
      A F H N H L N D F A H I E D P L E R R R L A L E S I

      170     180     190     200     210     220     230     240
S288C  ATGACGAAAGGTTTGGTGGCAACAAGTTAAGACCATCTCCATTGCTGGTGGTTGGTTTCTTGACAGATTCTTATGATATT
GRF167  ATGACGAAAGGTTTGGTGGCAACAAGTTAAGACCATCTCCATTGCTGGTGGTTGGTTTCTTGACAGATTCTTATGATATT
UVA     ATAAACGAAAGGTTTGGTGGCAACAAGTTCAAGACCATCTCCATTGCTGGTGGTTGGTTTCTTGACAGATTCTGATGATATC
      D D E G F G W Q Q V K T I S I A G V G F L T D S Y D I
      D D E G F G W Q Q V K T I S I A G V G F L T D S Y D I
      D N E G F G W Q Q V K T I S I A G V G F L T D S Y D I

      250     260     270     280     290     300     310     320
S288C  TTTGCCATTAATTTGGGTATCACTATGATGTCCTACGTTTACTGGCACGGTAGTATGCCAGGTCCAAGTCAAACCTTGTGT
GRF167  TTTGCCATTAATTTGGGTATCACTATGATGTCCTACGTTTACTGGCACGGTAGTATGCCAGGTCCAAGTCAAACCTTGTGT
UVA     TTCGCCATCAACTTGGGTATCTCCATGATGTCCTACTGGCACGGTAGCATGCCAGTTCAGTCAAACCTTGTGT
      F A I N L G I T M M S Y V Y W H G S M P G P S Q T L L
      F A I N L G I T M M S Y V Y W H G S M P G P S Q T L L
      F A I N L G I S M M S Y V Y W H G D M P A S S Q T L L

      330     340     350     360     370     380     390     400
S288C  GAAAGTTTCCACTTCGTTGGTACTGTTATTTGGTCAATTTGGTGGTGGTACTTATGATATTGTTGGTGGTAAAGAGAA
GRF167  GAAAGTTTCCACTTCGTTGGTACTGTTATTTGGTCAATTTGGTGGTGGTACTTATGATATTGTTGGTGGTAAAGAGAA
UVA     GAAAGTTTCCACTTCGTTGGTACTGTTATTTGGTCAAGTGGTGGTGGTACTTATGGCCGATATCGTTGGTGGTAAAGAGA
      K V S T S V G T V I G Q V G F G T L A D I V G R K R
      K V S T S V G T V I G Q V G F G T L A D I V G R K R
      K V S T S V G T V I G Q V G F G T L A D I V G R K K

      410     420     430     440     450     460     470     480
S288C  TTTATGGTATGGAACTTATTATCATGATTGCTGTACCATTTCTGAAAACCACTGTTGCTCATTCTCCTGCTATTAACTTC
GRF167  TTTATGGTATGGAACTTATTATCATGATTGCTGTACCATTTCTGAAAACCACTGTTGCTCATTCTCCTGCTATTAACTTC
UVA     TTTATGGTTTGGAACTTATTATCATGATTGTTGTACCATTTTGAACCAACCTGCGTCACTCTCCTGCCATCAACTTC
      I Y G M E L I I M I V C T I L Q T T V A H S P A I N F
      I Y G M E L I I M I V C T I L Q T T V A H S P A I N F
      I Y G L E L I I M I V C T I L Q T T V A H S P A I N F

      490     500     510     520     530     540     550     560
S288C  GTTGGTGTTTTAACTTCTACCGTATTGTCATGGGTATTGGTATCGGTGGTGACTACCCAGTATCTTCTATTATTAATTC
GRF167  GTTGGTGTTTTAACTTCTACCGTATTGTCATGGGTATTGGTATCGGTGGTGACTACCCAGTATCTTCTATTATTAATTC
UVA     GTTGCCGTTTGAACCTTCTACCGTATTGTCATGGGTATTGGTGGTGACTACCCCTATCTTCTATTATTAATTC
      V A V L T F Y R I V M G I G I G G D Y P L S S I I T S
      V A V L T F Y R I V M G I G I G G D Y P L S S I I T S
      V A V L T F Y R I V M G I G I G G D Y P L S S I I T S

      570     580     590     600     610     620     630     640
S288C  TGAATTTGCCACTACCAAAAGGAGAGGTCGCATCATGGGTGCTCTTTGCTAAACCAAGCTTGGGGTCAAATTCACGGTTC
GRF167  TGAATTTGCCACTACCAAAAGGAGAGGTCGCATCATGGGTGCTCTTTGCTAAACCAAGCTTGGGGTCAAATTCACGGTTC
UVA     TGAATTTGCTACTACCAAAAGGAGAGGTCGCATCATGGGTGCCCTCTTCGCCAACCAAGCTTGGGGTCAAATTCACGGTTC
      E F A T T K W R G A I M G A V F A N Q A W G Q I S G
      E F A T T K W R G A I M G A V F A N Q A W G Q I S G
      E F A T T K W R G A I M G A V F A N Q A W G Q I S G

      650     660     670     680     690     700     710     720
S288C  CTATCATCGCCTTATCTTGGTTCCTGCTTCAAGGGCGAACTAGAAATACGCAAACTCTGCTGCTGAATGTGATGCTAGA
GRF167  CTATCATCGCCTTATCTTGGTTCCTGCTTCAAGGGCGAACTAGAAATACGCAAACTCTGCTGCTGAATGTGATGCTAGA
UVA     CTATCATCGCCTTATTTTGGTTCCTGCTTCAAGAAATGACTTAAACTATGCTAACTCCCGTCCGCAATGTGACGCCAGA
      G I I A L I L V A A Y K G E L E Y A N S G A E C D A R
      G I I A L I L V A A Y K G E L D Y A N S G A E C D A R
      G I I A L I L V A A Y K N D L N Y A N S G A E C D A R

      730     740     750     760     770     780     790     800

```

**S288C** TGTCAAAAAGGCTTGTGACCAAAATGTGGAGAAATCCCTTATTGGGTTGGGTACCGTTCTAGGGTTGGCATGTTTGTATTTTCAG  
C Q K A C D Q M W R I L I G L G T V L G L A C L Y F R  
**GRF167** TGTCAAAAAGGCTTGTGACCAAAATGTGGAGAAATCCCTTATTGGGTTGGGTACCGTTCCAGGTTTGGCATGTTTGTATTTTCAG  
C Q K A C D Q M W R I L I G L G T V P G L A C L Y F R  
**UVA** TGTCAAAAAGGCTTGTGACCAAAATGTGGAGAGTGCCTTATTGGTTTAGGTACCGTCCAGGTTTGGCTATGCTGTACTTCAG  
C Q K A C D Q M W R V L I G L G T V P G L L C L Y F R

810 820 830 840 850 860 870 880  
**S288C** ATTAACTATTCCAGAAATCTCCTAGATATCAATTGGATGTTAACGCTAAGTTGGAACTTGC TGCTGCCGCACAAGAAACA  
L T I P E S P R Y Q L D V N A K L E L A A A A Q E Q  
**GRF167** ATTGACTATTCCAGAAATCTCCTAGATATCAATTGGATGTTAACGCTAAGTTGGAACTTGC TGCTGCCGCACAAGAAACA  
L T I P E S P R Y Q L D V N A K L E L A A A A Q E Q  
**UVA** ATTGACCATTCCAGAAATCCCAAGATATCAATTAGAGCTTAATGCTGAATTG --- TTGGCTGTTGAAAAGAAAGAAACA  
L T I P E S P R Y Q L D V N A E L L R V E K K E Q

890 900 910 920 930 940 950 960  
**S288C** CAITGGCGAAAAAATAAATTCACGACACCGAGTCAITCAAGACATGGCAATTAACGGTTTGGAAAAGAGCTTCTACTGCCGTCGA  
D G E K K I H D T S D E D M A I N G L E R A S T A V E  
**GRF167** CAITGGCGAAAAAATAAATTCACGACACCGAGTCAITCAAGACATGGCANNNTAAAGGTTTGGAAAAGAGCTTCTACTGCCGTCGA  
D G E K K I H D T S D E D M X X N G L E R A S T A V E  
**UVA** GAAGCTGAAAAAATAAATTCACGACACCGAGTCAITCAAGACATGGCTAATCCAGGTTTGGAAAAGAGCTTCCAAACCGCTGTCGA  
E A E K K L Y G T S D D D M A I H G L E R A P T A V E

970 980 990 1000 1010 1020 1030 1040  
**S288C** ATCTCTTGACAATCATCCTCCAAAAGGCTTCTCAAGATTTCTGCAGACATTTTGGTCAATGGAAGTACGGTAAAGATTT  
S L D N H P P K A S F K D F C R H F G Q W K Y G K I  
**GRF167** ATCTCTTGACAATCATCCTCCAAAAGGCTTCTCAAGATTTCTGCAGACATTTTGGTCAATGGAAGTACGGTAAAGATTT  
S L D N H P P K A S F K D F C R H F G Q W K Y G K I  
**UVA** ATCCATGACATGCAATCCTCCAAAAGGCTTCAATCAAGATTTCTGCAGACATTTTGGTCAATGGAAGTAAAGATTT  
S I D M H P P K A S F K D F C K H F G Q W K Y G K I

1050 1060 1070 1080 1090 1100 1110 1120  
**S288C** TGGTAGGTACTGGCTGGTTTACGGTTTACCTTAGATGTTGGCTTTCTACGGGTTGAGTTTAAACAGTGGCTGTTATTCTGC  
L L E S T A G S W F T L D V A F Y G L S L N S A V I L Q  
**GRF167** TGGTAGGTACTGGCTGGTTTACGGTTTACCTTAGATGTTGGCTTTCTACGGGTTGAGTTTAAACAGTGGCTGTTATTCTGC  
L L G T A G S W F T L D V A F Y G L S L N S A V I L Q  
**UVA** TATTGGGTACTGGCGGTTTACGGTTTACCTTAGATGTTGGCTTTCTACGGGTTAAGTTTGAACAGTGGCATTATCTTGC  
L L G T A G S W F M L D V A F Y G L S L N S A I I L Q

1130 1140 1150 1160 1170 1180 1190 1200  
**S288C** ACCATCGGTTATGCGGTTCCAAAAAGCTTTACAAGAAACGTATGATACATGCTGCTGGTAATCTGATTTTGTATTTGCG  
T I G Y A G S K N V Y K K L Y D T A V G N L I L I C A  
**GRF167** ACCATCGGTTATGCGGTTCCAAAAAGCTTTACAAGAAACGTATGATACATGCTGCTGGTAATCTGATTTTGTATTTGCG  
T I G Y A G S K N V Y K K L Y D T A V G N L I L I C A  
**UVA** ACCATCGGTTACCGTGGTTCCAAAGAGCTTTACAAGAAAGTTTACGATTCGCTGCTGGTAATCTGATTTTGTATTTGCG  
T I G Y A G S K N V Y K K L Y D S A V G N L I L I C A

1210 1220 1230 1240 1250 1260 1270 1280  
**S288C** TGGTTCAATACCTGGTTACTGGGTTATCCGTTCTCACTGTCGATATAATCGGTAGAAAACCAATTC AATAGCCGGTTCA  
G S L P G Y W V S V F T V D I I G R K P I Q L A G F  
**GRF167** TGGTTCAATACCTGGTTACTGGGTTATCCGTTCTCACTGTCGATATAATCGGTAGAAAACCAATTC AATAGCCGGTTCA  
G S L P G Y W V S V F T V D I I G R K P I Q L A G F  
**UVA** TGGTTCTTTACCGGTTACTGGATGAGTGTGTTTCACTGTCGATATCATTGGTAGAAAACCAATTC AATAGCCGGTTCA  
G S L P G Y W M S V F T V D I I G R K P I Q L A G F

1290 1300 1310 1320 1330 1340 1350 1360  
**S288C** TCACTTTGACCGCTTTGTTCTGTGTCATCGGTTTCGATACCAATAAACTTGGTACCATGCTGTTGGCTCTTTACGTC  
I I L T A L F C V I G F A Y H K L G D H G L L A L Y V  
**GRF167** TCACTTTGACCGCTTTGTTCTGTGTCATCGGTTTCGATACCAATAAACTTGGTACCATGCTGTTGGCTCTTTACGTC  
I I L T A L F C V I G F A Y H K I G D H G L L A L Y V  
**UVA** TCACTTTGACTTATTCTGTTCTGTGTCATCGGTTTTCGATACCAATAAAGTTGGTACCATGCTTATTGGCTCTTTACGTC  
I I L T I L F C V I G F A Y H K I G D H G L L A L Y V

1370 1380 1390 1400 1410 1420 1430 1440  
**S288C** ATTTGTCAATTTCTTCCAAAAGCTTGGTCCAAACACAAACCCCTTATTGTTCCCTGGTGGTGTTCCTCCAACTCGTTACAG  
I C Q F F Q N F G P N T T T F I V P G E C F P T R Y R  
**GRF167** ATTTGTCAATTTCTTCCAAAAGCTTGGTCCAAACACAAACCCCTTATTGTTCCCTGGTGGTGTTCCTCCAACTCGTTACAG  
I C Q F F Q N F G P N T T T F I V P G E C F P T R Y R  
**UVA** ATCTGTCAATTTCTTCCAAAAGCTTGGTCCAAACACTACTACATTTATCGTTCCAGGTGAGTGTTCCTCCACCCGTTACAG  
I C Q F F Q N F G P N T I T F I V P G E C F P T R Y R

1450 1460 1470 1480 1490 1500 1510 1520  
**S288C** ATCTACTGCTCAITGGTATTTTCTGCTGCTATCGGTAAGGTTGGTCCCATTAATGCAAAAACCGCTTTGGGTACTCTAATCS  
S T A H G I S A A S G K V G A I I A Q T A L G T L I

**GRF167** ATCTACTGCTCATGGTATTTCTGCTGGCATCTGGTAAGGTCGGTGCCATTATTGCACAAACCGCCTTGGGTACTCTAATCG  
 S T A H G I S A A S G K V G A I I A O T A L G T L I  
**UVA** ATCTACTGCTCATGGTATTTCTGCCGATCCGGTAAGATTGGTGCCATTATCGCCAAACCGCCTTGGGTACTTTGATCA  
 S T A H G I S A A S G K I G A I I A Q T A L G T L I

1530 1540 1550 1560 1570 1580 1590 1600

**S288C** ACCATAACTGTGCTAGAGACGGTAAGCCAAACCAACTGTGGTTACCTCACGTCATGGAAAATTTTCGCCTTATTCATGTTG  
 D H N C A R D G K P T N C W L P H V M E I F A L F M L  
**GRF167** ACCATAACTGTGCTAGAGACGGTAAGCCAAACCAACTGTGGTTACCTCACGTCATGGAAAATTTTCGCCTTATTCATGTTG  
 D H N C A R D G K P T N C W L P H V M E I F A L F M L  
**UVA** ACCAACTGTGCCAAGGACGGTAAGGCCAATAACTGTGGTTACCTCACGTCATGGAAAATTTTCGCCTTTTATGTTA  
 N H N C A K D G K A T N C W L P H V M E I F A L F M L

1610 1620 1630 1640 1650 1660 1670 1680

**S288C** TTGGGTATCTTCACAAACCTTGTGATCCCAGAAAATAAGAGAAAAGACTCTAGAAAGAAAATAACGAGCTATACCAGATGA  
 L G I F T T L L I P E T K R K T L E E I N E L Y H D E  
**GRF167** TTGGGTATCTTCACAAACCTTGTGATCCCAGAAAATAAGAGAAAAGACTCTAGAAAGAAAATAACGAGCAATACCAGATGA  
 L G I F T T L L I P E T K R K T L E E I N E Q Y H D E  
**UVA** TTAGGTATCTTCACACTCTGTGATCCAGAAAACCAAGAGAAAAGCCCTGGAAAGAAATCAACGAGAAATACCAGATGA  
 L G I F T T L L I P E T K R K T L E E I N E K Y H D E

1690 1700 1710 1720 1730 1740 1750 1760

**S288C** AATCGATCCTGCTACGCTAAACTTCAGAAAACAAATAATGACATTGAATCTTCCAGCCCATCTCAACTTCAACATGAAG  
 I D P A T L N F R N K N N D I E S S S P S Q L Q H E  
**GRF167** AATCGATCCTGCTACCTAAACTTCAGAAAACAAATAATGACATTGAATCTTCCAGCCCATCTCAACTTCAACATGAAG  
 I D P A T L N F R N K N N D I E S S S P S Q L Q H E  
**UVA** AATCGACCCCTGGTACGCTCAACTACAGAAAACAAATGAACGATGTCGAATCTTCTTCCATCTCAAAATCAACATTGAG  
 I D P G T L N Y R N K M N D V E S S S P S Q I Q H \*

**S288C** CATAA ---  
 A \*

**GRF167** CATAA ---  
 A \*

**UVA** CTTACTGA  
 A Y \*
